# Supplementary material for: In-silico phenotype-correlation analysis of Inherited variations in Autism Spectrum Disorder families identify complex interplay between genes encoding Sensory functions and Repetitive-Behaviours- a pilot study from India
Source: Research Square preprint supplement (doi:10.21203/rs.3.rs-8809718/v1), 2026-02-18
Supplement: Supplementary file 2 [file 687e4293be677dbe5ccebb9f.xlsx]

## Sheet: Clinical details 
Title: In-silico phenotype-correlation analysis of Inherited variations in Autism Spectrum Disorder families identify complex interplay between genes encoding Sensory functions and Repetitive-Behaviours- a pilot study from India
Journal Name: Journal of Community Genetics
Authors Name: Meghana Kommerahalli RameshRaju 1#, Snijesh Valiya Parambath2, Durbagula Srividhya 3, Bhagyalakshmi Shankarappa4, Ramachandra Nallur Basappa1*, and Ashitha S.Niranjana Murthy 4#*
Affiliations:1. Department of Studies in Genetics and Genomics, University of Mysore, Mysore- 570005, Karnataka, India 2. Department of Molecular Medicine, St. John’s Research Institute, St. John’s National Academy of Health Science, Bangalore-560034, Karnataka, India 3. Centre for Advance Research and Excellence in Autism and Developmental Disorders (CAREADD), St. John’s Research Institute, St. …
* Corresponding Author Dr. Ashitha S.Niranjana Murthy Email: ashithasnm09@gmail.com
Sample ID	Age	Native State	Comorbidity	Consanquinity Yes/No	Father's age at time of birth	Mother's age at time of birth	Mode of birth	Term of Birth	Birth weight (in kgs)	Psychiatric Family History	History of developmental delay in family	Maternal complication
003C	7	Haryana		No	30	28	LSCS	Full term	3.5	nil	nil
004C	5	karnataka		No	30	27	LSCS	Full term	3	Third degree -unknownpsychiatric issue	nil
007C	8	karnataka		No	33	30	LSCS	full term	3	il	nil
009C	3.1	orissa		No	31	24	LSCS	Full term	3.1	nil	nil
010C	8	karnataka		No	30	26	Normal	Full term	3.2	nil	nil
013C	4.9	karnataka		No	33	27	LSCS	Late term	3.8	nil	nil
022C	4.1	karnataka		No	34	26	Normal with forceps	Full term	3.5	2nd degree relation -unknown psychiatry history	nil
023C	15	Karnataka		No	34	29	LSCS	Full term	3.2	nil	nil
030C	3	karnataka		No	33	23	LSCS	Full term	3.3	nil	nil
034C	15	karnataka		No	30	24	Normal	Full term	2.5	nil	nil
036C	8	tamil naduu		No	30	24	LSCS	Full term	3.1	nil	nil
042C	5.2	karnataka		No	34	26	LSCS	Late term	3.4	nil	nil
044C	16	karnataka		No	36	31	LSCS	Full term	2.8	nil	nil
105C	5.6	Karnataka		No	34	32	Normal	Full term	2.9	nil	nil
101C	3.25	Karnataka		No	41	34	Normal	Full term	3.4	nil	nil
92	4.9	Kerala		No	34	34	LSCS	Full term	3.5	nil	nil	Thyroid
90	8.6	Tamil Nadu	ASD with ADHD	No	34	28	Normal	Full term	3.1	nil	nil
89	4	Bihar		No	34	26	LSCS	Full term	3.8	nil	nil	Gestational Diabetes
81	8.6	Tamil Nadu		No	35	32	LSCS	Full term	3.16	nil	nil
78	8.5	Madhyapradesh		No	33	29	LSCS	Full term	2.5	nil	nil
61	6.1	Uttarpradesh		No	34	33	LSCS	Full term	3	nil	nil
80	6.6	Telengana		No	37.92	30.92	LSCS	Full term	4	nil	nil
87	11.5	Kerala		No	29.94	25.94	Normal	Full term	3.07	nil	nil
Integers ending with C refers to Sample ID
LSCS- Lower Segment Caesarean section

## Sheet: Inherited Gene Functions
751 Inherited genes	Chromo-some no.	Reported genes (SFARI + denovo DB)/ unreported genes	Total Weighted score	Behaviour Functions										Sensory Functions	Neuronal Functions	Brainspan DB Expression	Differentially expressed genes (DEG)with protein interactions (PPI)	Genes mutated in each child:- number ending with C refers to Sample ID; 0=no mutation, integers refer to number of mutations
				ASD	Social Interaction (SI)	restrictive repetitive behaviour (RRB)	Communication & Language (CL)	Cognition, Intelligence & Learning (CIL)	Emotions & Moods (EM)	Activity (Act)	comoridities & other behaviours	Total behaviours	core ASD behaviour (ASD+RRB+SI)					10C	13C	1C	22C	23C	30C	34C	36C	3C	42C	44C	4C	7C	9C	Total # Variations	Total # Genes	Truncating SNP	missense SNP	splice SNP	Zygosity	Mode of Inheritance
AASDHPPT	chr11	Unreported	6	0	0	0	0	0	1	0	1		0		myelin, basal ganglia	Prenatally		0	1	0	0	0	0	0	0	0	0	0	0	0	0	1	1	0	1	0	Hetero	Paternal
AATK	chr17	Unreported	2.5	no	no	no	no	no	no	no	yes	1	0		CNS, neuron, brain development, axon, brain morphology	Postnatally		0	0	0	0	0	1	0	0	1	0	0	0	0	0	2	2	0	2	0	Hetero	Both
ABCA13	chr7	SFARI score 3	3	no	no	no	no	no	no	no	yes	1	0					0	0	0	1	0	0	0	0	0	0	0	0	0	0	1	1	0	0	1	Hetero	maternal
ABCA8	chr17	denovoDB	3.5	no	no	no	yes	no	no	no	no	1	0			Postnatally	DEG+PPI	0	0	0	0	0	0	0	0	0	0	0	1	0	0	1	1	0	1	0	Hetero	maternal
ABCC12	chr16	denovoDB	2									0						0	0	0	0	0	0	0	0	0	0	1	0	0	0	1	1	0	1	0	Hetero	maternal
ABCC9	chr12	Unreported	9.5	no	yes	no	yes	no	no	no	yes	3	1		cerebral cortex			0	0	0	1	0	0	0	0	0	0	0	0	0	0	1	1	0	0	1	Hetero	maternal
ABCG5	chr2	Unreported	4.5	no	no	no	no	no	no	no	yes	1	0	pain				0	0	0	0	0	1	0	0	0	0	0	0	1	0	2	2	0	2	0	Hetero	Both
ACADL	chr2	Unreported	1.5	no	no	no	no	no	no	no	no	0	0	thermal				1	0	0	0	0	0	0	0	0	0	0	0	0	0	1	1	0	1	0	Hetero	maternal
ACBD5	chr10	Unreported	3.5	no	no	no	no	no	no	no	yes	1	0		myelin, purkinje, axon, glia			0	0	1	0	0	0	0	0	0	0	0	0	0	0	1	1	0	0	1	Hetero	maternal
ACOX2	chr3	denovoDB	3	no	no	no	yes	yes	no	no	no	2	0					0	1	0	0	0	0	0	0	0	0	0	0	0	0	1	1	0	1	0	Hetero	maternal
ACP2	chr11	denovoDB	4	no	no	no	no	no	yes	no	yes	2	0		CNS, astrocyte, purkinje, cerebellum, glia			0	0	0	0	1	1	0	0	0	0	0	0	0	0	2	2	1	1	0	Hetero	Both
ADAMTS14	chr10	denovoDB	3	no	no	no	no	no	no	no	yes	1	0					0	0	0	0	0	0	0	0	0	0	1	0	0	0	1	1	0	1	0	Hetero	Paternal
ADAMTSL5	chr19	denovoDB	3.5									0						0	0	0	0	0	0	0	0	0	0	0	0	0	1	1	1	0	1	0	Hetero	maternal
ADCY6	chr12	denovoDB	6	no	no	no	no	no	no	no	yes	1	0		neuron, synapse			0	1	0	0	0	0	0	0	0	0	0	0	0	0	1	1	0	1	0	Hetero	Paternal
ADCY7	chr16	Unreported	8.5	no	no	no	no	no	yes	no	yes	2	0		neuron, synapse			0	0	0	0	0	0	0	0	1	0	0	0	0	0	1	1	0	1	0	Hetero	maternal
ADGRA3	chr4	Unreported	4	no	no	no	no	no	no	no	yes	1	0					1	0	0	0	0	0	0	0	0	0	0	0	0	0	1	1	0	1	0	Hetero	maternal
ADGRV1	chr5	Unreported	2.5	no	no	no	yes	no	yes	no	yes	3	0	hearing, visual	neuron,			0	1	0	0	0	0	0	0	0	0	0	0	0	0	1	1	0	1	0	Hetero	Paternal
ADHFE1	chr8	Unreported	5.5									0			neurotransmitter	Postnatally		0	0	0	0	0	0	0	0	1	0	0	0	0	0	1	1	1	0	0	Hetero	Paternal
ADSL	chr22	SFARI score 1	9	yes	yes	no	yes	yes	yes	no	yes	6	2		myelin, cerebellum,			0	0	0	0	0	0	1	0	0	0	0	0	0	0	1	1	0	1	0	Hetero	maternal
AGA	chr4	Unreported	1.5	no	no	no	no	yes	no	no	yes	2	0		cerebral, astrocyte, purkinje, cerebellum, axon, brain morphology			0	1	0	0	0	0	0	0	0	0	0	0	0	0	1	1	0	1	0	Hetero	maternal
AGBL4	chr1	SFARI score 3	4.5	no	no	no	no	no	no	no	yes	1	0					0	0	0	0	0	0	1	0	0	0	0	0	0	0	1	1	0	1	0	Hetero	Paternal
AGPAT5	chr8	denovoDB	5.5									0						0	1	0	0	0	0	0	0	0	0	0	0	0	0	1	1	0	1	0	Hetero	maternal
AGRN	chr1	denovoDB	3.5	no	no	no	no	no	no	no	yes	1	0		neurodevelopmental, paired-pulse, neurotransmitter, neuron, neuromuscular, progressive postnatal microcephaly, axon, synapse,	Prenatally	DEG+PPI	0	0	0	0	0	0	0	0	0	0	0	2	0	0	2	1	1	1	0	Hetero	maternal
ALAS1	chr3	Unreported	6									0						0	1	0	0	1	0	0	0	0	0	0	0	0	0	2	2	0	2	0	Hetero	Both
ALDH1L2	chr12	Unreported	4.5									0						0	0	0	0	0	0	0	0	0	0	0	0	0	1	1	1	0	1	0	Hetero	Paternal
ALDOB	chr9	Unreported	3	no	no	no	no	no	no	yes	no	1	0	pain				0	0	0	0	0	0	0	0	0	1	0	0	0	0	1	1	0	1	0	Hetero	maternal
ALG3	chr3	Unreported	4.5	no	no	no	no	yes	no	no	yes	2	0	visual	cerebellum			0	0	0	0	0	0	0	0	0	0	0	0	1	0	1	1	0	1	0	Hetero	Paternal
ALG8	chr11	Unreported	2	no	no	no	no	no	no	yes	no	1	0					0	0	0	0	0	0	1	0	0	0	0	0	0	0	1	1	0	1	0	Hetero	Paternal
ALPP	chr2	Unreported	5									0						0	0	1	0	0	0	0	0	0	0	0	0	0	0	1	1	0	1	0	Hetero	maternal
AMPD1	chr1	SFARI score 2	2	yes	no	no	no	no	no	no	no	1	1					0	0	0	0	0	0	0	0	0	0	0	0	0	1	1	1	0	1	0	Hetero	Paternal
ANK2	chr4	SFARI score 1	6.5	no	yes	no	yes	no	no	no	yes	3	1		neuron, axon, microenchalopathy corpus callosum, corpus callosum,			0	0	0	0	0	0	0	0	0	0	0	0	1	0	1	1	0	1	0	Hetero	Paternal
ANK3	chr10	SFARI score 1	9	yes	yes	no	no	yes	yes	yes	yes	6	2		dendrite, neuron, neuromuscular, purkinje, cerebellum, axon, synapse			0	0	0	0	1	0	0	0	0	0	0	0	0	0	1	1	0	1	0	Hetero	maternal
ANKLE1	chr19	Unreported	2.5									0						0	0	0	0	0	0	0	0	0	0	0	0	1	0	1	1	1	0	0	Hetero	Paternal
ANKRD27	chr19	denovoDB	4.5	no	no	no	no	no	yes	no	no	1	0		neuron			0	0	0	0	0	0	0	0	0	1	0	0	0	0	1	1	0	1	0	Hetero	maternal
ANKRD44	chr2	Unreported	2	no	no	no	yes	no	no	no	yes	2	0					0	0	1	0	0	0	0	0	0	0	0	0	0	0	1	1	1	0	0	Hetero	Paternal
ANO1	chr11	Unreported	4.5	yes	no	no	no	no	no	no	no	1	1	pain				0	0	0	0	0	0	1	0	0	0	0	0	0	0	1	1	0	1	0	Hetero	maternal
ANXA3	chr4	Unreported	1.5									0						0	0	0	0	0	0	0	0	0	1	0	0	0	0	1	1	0	1	0	Hetero	Paternal
ANXA6	chr5	Unreported	5									0			neural crest	Postnatally	DEG+PPI	1	0	0	0	0	0	0	0	0	0	0	0	0	0	1	1	0	1	0	Hetero	maternal
AOC2	chr17	Unreported	2									0						0	0	0	0	0	0	1	0	0	0	0	0	0	0	1	1	0	1	0	Hetero	maternal
AOX1	chr2	Unreported	4									0						0	0	0	0	0	0	1	0	0	0	0	0	0	0	1	1	0	1	0	Hetero	Paternal
AP5Z1	chr7	denovoDB	3	no	no	no	no	no	no	no	yes	1	0					0	0	0	0	1	0	0	0	0	0	0	0	0	0	1	1	0	1	0	Hetero	Paternal
APC	chr5	Unreported	20.5	yes	yes	no	no	yes	no	no	no	3	2	pain	BDNF, astrocyte, neuron, crania, neuronal migration, microenchalopathy corpus callosum, brain development, neural tube, brain morphology			0	0	0	0	0	0	0	0	0	1	0	0	0	0	1	1	0	1	0	Hetero	Paternal
AQP11	chr11	Unreported	3.5									0						0	0	0	0	0	0	0	0	0	1	0	0	0	0	1	1	1	0	0	Hetero	Paternal
AQP2	chr12	Unreported	6	no	no	no	no	no	yes	no	no	1	0					0	1	0	0	0	0	0	0	0	0	0	0	0	0	1	1	0	1	0	Hetero	Paternal
ARAP1	chr11	denovoDB	4.5	no	no	no	no	no	no	no	yes	1	0		neuronal migration			0	0	0	0	0	0	0	0	0	0	0	0	0	1	1	1	0	1	0	Hetero	Paternal
ARHGEF11	chr1	denovoDB	7	no	no	yes	no	no	yes	yes	yes	4	1		neuronal migration, progressive postnatal microcephaly			0	0	0	1	0	0	0	0	0	0	0	0	0	0	1	1	0	1	0	Hetero	maternal
ARHGEF12	chr11	Unreported	5	no	no	no	yes	yes	no	no	yes	3	0		axon			0	0	0	0	0	0	0	1	0	0	0	0	0	0	1	1	0	1	0	Hetero	maternal
ARID4A	chr14	Unreported	8	yes	no	no	yes	no	no	yes	no	3	1					0	0	0	0	0	0	0	0	0	0	1	0	0	0	1	1	0	0	1	Hetero	maternal
ARMC7	chr17	Unreported	4									0						1	0	0	0	0	0	0	0	0	0	0	0	0	0	1	1	0	1	0	Hetero	Paternal
ART5	chr11	Unreported	1.5									0						0	0	0	0	0	0	0	0	0	0	0	2	0	0	2	1	2	0	0	Hetero	maternal
ASB5	chr4	Unreported	5.5									0						0	0	0	0	0	0	1	0	0	0	0	0	0	0	1	1	0	1	0	Hetero	maternal
ASCC3	chr6	denovoDB	6.5	no	yes	no	yes	yes	no	no	yes	4	1					0	0	0	0	0	0	0	1	0	0	0	0	0	0	1	1	0	1	0	Hetero	Paternal
ASIC2	chr17	Unreported	8	yes	no	no	yes	yes	yes	no	yes	5	1	hearing	brainstem morphology, CNS, neuron, synapse, PNS			0	1	0	0	0	0	0	0	0	0	0	0	0	0	1	1	0	1	0	Hetero	Paternal
ASPM	chr1	SFARI score 2	4	no	no	no	no	no	no	no	yes	1	0		cerebral, astrocyte, cerebral cortex, neocortex, microenchalopathy corpus callosum, brain development, microcephaly, NPC, brain morphology	Prenatally	DEG+PPI	0	0	0	0	1	0	0	0	0	0	0	0	0	0	1	1	0	1	0	Hetero	maternal
ASTN1	chr1	Unreported	9.5	yes	no	no	yes	yes	no	no	yes	4	1		cerebellar ataxia, psycho delay, neuron, cerebellum			0	0	0	0	0	0	0	0	0	1	0	0	0	0	1	1	0	1	0	Hetero	maternal
ATE1	chr10	Unreported	5									0						0	0	1	0	0	0	0	0	0	0	0	0	0	0	1	1	0	1	0	Hetero	maternal
ATG2B	chr14	denovoDB	1.5	no	no	no	no	yes	no	no	no	1	0		cerebellum			0	0	0	0	0	1	0	0	0	0	0	0	0	0	1	1	0	1	0	Hetero	Paternal
ATP13A5	chr3	Unreported	3.5	no	no	no	no	no	no	no	no	0	0	sensory				1	0	0	0	0	0	0	0	0	0	0	0	0	0	1	1	0	1	0	Hetero	maternal
ATP2A3	chr17	denovoDB	7	no	no	no	yes	no	no	no	no	1	0		cerebellum, neuron,	Postnatally	DEG+PPI	0	0	0	0	0	0	1	0	0	0	0	0	0	0	1	1	1	0	0	Hetero	Paternal
ATP7B	chr13	Unreported	3	no	no	no	no	no	no	no	no	0	0		cerebral, brain morphology			1	0	0	0	0	0	0	0	0	0	0	0	0	0	1	1	0	1	0	Hetero	maternal
ATP9B	chr18	Unreported	4	yes	no	no	no	no	no	no	yes	2	1					0	0	0	0	0	0	0	0	0	0	1	0	0	0	1	1	0	1	0	Hetero	Paternal
ATRN	chr20	Unreported	5	no	no	no	no	no	no	yes	yes	2	0		myelin, astrocyte, cerebral cortex, neuron, neuronal migration, cerebellum, thalamus, brain morphology			0	0	1	0	0	0	0	0	0	0	0	0	0	0	1	1	0	1	0	Hetero	Paternal
AURKB	chr17	Unreported	6	no	no	no	no	no	no	no	yes	1	0		microenchalopathy, corpus callosum	Prenatally	DEG+PPI	0	0	0	0	0	0	0	0	1	0	0	0	0	0	1	1	0	1	0	Hetero	Paternal
AXIN2	chr17	Unreported	7	yes	no	no	no	no	no	no	yes	2	1		neural plate, neural crest, crania, neural tube			0	0	1	0	0	0	0	0	0	0	0	0	0	0	1	1	0	1	0	Hetero	Paternal
BCKDHB	chr6	Unreported	3.5									0			cerebral edema			0	0	0	0	0	0	0	0	0	0	0	1	0	0	1	1	0	1	0	Hetero	maternal
BLVRB	chr19	Unreported	1.5									0				Postnatally		0	0	0	0	0	0	0	0	1	0	0	0	0	0	1	1	1	0	0	Hetero	Paternal
BNIP3L	chr8	Unreported	3.5	no	no	no	no	yes	no	no	yes	2	0					0	0	0	0	0	0	0	0	1	0	0	0	0	0	1	1	0	1	0	Hetero	Paternal
BRD8	chr5	Unreported	6	no	no	no	no	no	yes	no	no	1	0					0	0	0	0	0	0	0	1	0	0	0	0	0	0	1	1	0	1	0	Hetero	Paternal
BRINP2	chr1	Unreported	8.5	no	no	no	no	no	no	no	yes	1	0		dendrite, neuron			0	0	0	1	0	0	0	0	0	0	0	0	0	0	1	1	0	1	0	Hetero	Paternal
BTBD1	chr15	Unreported	2	no	no	no	no	no	no	no	no	0	0		myelin, neuron			0	0	0	0	0	0	0	0	0	0	0	0	0	1	1	1	0	1	0	Hetero	Paternal
BTBD11	chr12	denovoDB	5.5									0				Postnatally		0	0	0	0	0	0	0	0	0	0	0	0	0	1	1	1	0	1	0	Hetero	maternal
BUB1	chr2	Unreported	8	yes	no	no	no	no	no	yes	yes	3	1		microenchalopathy, corpus callosum	Prenatally	DEG+PPI	0	0	0	0	0	0	0	1	0	0	0	0	0	0	1	1	0	1	0	Hetero	Paternal
C1QL4	chr12	Unreported	1.5									0				Prenatally	DEG+PPI	0	0	0	0	0	0	0	0	1	0	0	0	0	0	1	1	0	1	0	Hetero	maternal
C5orf22	chr5	Unreported	3.5									0						0	0	0	1	0	0	0	0	0	0	0	0	0	0	1	1	0	1	0	Hetero	Paternal
CACNA1D	chr3	SFARI score 2	12	yes	no	no	no	yes	no	no	yes	3	1	hearing, visual	dopaminergic synapse, cerebral, brainstem, synapse			0	1	0	0	0	1	0	0	0	0	0	0	0	0	2	2	0	2	0	Hetero	maternal
CACNA1H	chr16	SFARI score 2	8	yes	no	no	yes	no	no	no	yes	3	1		neuron,	Prenatally	DEG+PPI	0	0	0	1	0	1	0	0	0	0	0	0	0	0	2	2	0	2	0	Hetero	Both
CACNA2D3	chr3	SFARI score 1	7	no	no	no	no	no	yes	yes	yes	3	0	pain	neuron,	Postnatally		0	0	0	0	0	0	0	0	0	0	0	0	0	1	1	1	0	1	0	Hetero	Paternal
CACNG3	chr16	Unreported	2.5	yes	no	no	yes	no	no	no	yes	3	1		neurotransmitter, synapse	Postnatally		0	0	0	0	0	0	0	0	0	0	0	1	0	0	1	1	0	1	0	Hetero	Paternal
CALCOCO1	chr12	Unreported	2	no	no	no	no	no	no	no	no	0	0					0	0	0	0	0	0	0	0	0	1	0	0	0	0	1	1	1	0	0	Hetero	Paternal
CAPN12	chr19	SFARI score 3	3									0				Postnatally		0	0	0	0	0	0	0	0	0	0	0	0	1	0	1	1	1	0	0	Hetero	maternal
CAPN15	chr16	Unreported	3.5	no	no	no	no	no	no	no	yes	1	0		neurodevelopmental			1	0	0	0	0	0	0	0	0	0	0	0	0	0	1	1	0	1	0	Hetero	Paternal
CAPN2	chr1	Unreported	1.5	no	no	no	no	no	no	no	yes	1	0		dendrite, neuronal migration, neuron			0	0	0	0	1	0	0	0	0	0	0	0	0	0	1	1	0	1	0	Hetero	maternal
CC2D2A	chr4	Unreported	3	no	no	no	no	no	no	no	yes	1	0		brain morphology			0	0	0	0	0	0	0	0	0	0	1	0	0	0	1	1	0	1	0	Hetero	Paternal
CCBE1	chr18	Unreported	1.5	no	yes	no	yes	no	yes	no	yes	4	1			Prenatally		0	0	0	0	1	0	0	0	0	0	0	0	0	0	1	1	0	1	0	Hetero	Paternal
CCDC114	chr19	Unreported	2.5									0						0	0	0	0	0	0	0	0	0	0	0	0	1	0	1	1	0	1	0	Hetero	maternal
CCDC141	chr2	denovoDB	1.5	no	no	yes	no	yes	yes	yes	no	4	1	pain	neuron,			1	0	0	0	0	0	0	0	0	0	0	0	0	0	1	1	1	0	0	Hetero	Paternal
CCDC151	chr19	Unreported	2.5									0						0	0	0	0	0	0	0	0	0	0	0	0	0	1	1	1	0	1	0	Hetero	Paternal
CCDC173	chr2	denovoDB	1.5									0						0	1	0	0	0	0	0	0	0	0	0	0	0	0	1	1	1	0	0	Hetero	Paternal
CCDC18	chr1	denovoDB	2	yes	no	no	no	no	no	no	no	1	1					0	0	1	0	0	0	0	0	0	0	0	0	0	0	1	1	1	0	0	Hetero	Paternal
CCNJL	chr5	denovoDB	1.5									0						0	0	0	0	0	0	0	1	0	0	0	0	0	0	1	1	0	0	1	Hetero	maternal
CCT8	chr21	Unreported	5.5	no	no	no	no	no	no	no	yes	1	0		neurodevelopmental,	Prenatally	DEG+PPI	0	0	0	1	0	0	0	0	0	0	0	0	0	0	1	1	0	0	1	Hetero	maternal
CD36	chr7	denovoDB	6	no	no	no	no	yes	no	no	yes	2	0	taste	myelin, PNS, glia, brain morphology			0	0	0	0	0	0	0	0	0	0	0	0	1	0	1	1	1	0	0	Hetero	maternal
CD63	chr12	Unreported	3.5	no	no	no	no	no	no	no	yes	1	0					0	0	0	0	0	0	0	0	0	0	0	0	1	0	1	1	0	1	0	Hetero	Paternal
CDC42BPA	chr1	denovoDB	9									0						0	0	0	0	1	0	0	0	0	0	0	0	0	0	1	1	0	1	0	Hetero	maternal
CDX1	chr5	denovoDB	1.5	no	no	no	no	no	no	no	yes	1	0					0	0	0	0	0	0	0	0	0	0	0	0	1	0	1	1	0	1	0	Hetero	Paternal
CELSR1	chr22	denovoDB	5	no	no	yes	no	no	no	no	no	1	1	hearing	neural plate, CNS, neuron, neuropore closure, crania, brainstem, neural tube	Prenatally		0	1	0	0	0	0	0	0	0	0	0	0	0	0	1	1	0	1	0	Hetero	maternal
CEP290	chr12	SFARI score 3	3.5	yes	no	no	no	yes	no	no	yes	3	1		corpus callosum, brain morphology			0	1	0	0	0	0	0	0	0	0	0	0	0	0	1	1	0	1	0	Hetero	Paternal
CERCAM	chr9	Unreported	1.5	no	no	no	no	no	no	no	yes	1	0			Postnatally	DEG+PPI	1	0	0	0	0	0	0	0	0	0	0	0	0	0	1	1	0	1	0	Hetero	Paternal
CFAP58	chr10	Unreported	1.5	no	no	no	no	no	no	no	yes	1	0					0	0	0	0	0	0	0	1	0	0	0	0	0	0	1	1	1	0	0	Hetero	Paternal
CFHR5	chr1	Unreported	2.5									0						0	0	0	0	0	0	0	1	0	0	0	0	0	1	2	2	0	0	2	Hetero	Paternal
CHAC1	chr15	Unreported	1.5									0			neuron	Postnatally		0	0	0	1	0	0	0	0	0	0	0	0	0	0	1	1	0	1	0	Hetero	Paternal
CHAT	chr10	Unreported	9.5	no	no	no	no	yes	no	yes	yes	3	0		schwann, neurotransmitter, neuron, neuromuscular, microenchalopathy corpus callosum, synapse			0	0	0	0	0	0	0	0	0	0	1	0	0	0	1	1	0	1	0	Hetero	Paternal
CHD7	chr8	SFARI score 1	13.5	yes	no	yes	no	yes	yes	yes	yes	6	2	hearing	neuroithelium, CNS, neural crest, hippocampus, neuron, crania, neocortex, microenchalopathy corpus callosum, corpus callosum, brain development, brainstem, NPC	Prenatally	DEG+PPI	0	0	0	0	0	0	0	1	0	0	1	0	0	0	2	2	0	2	0	Hetero	Paternal
CHEK2	chr22	Unreported	4									0						0	0	0	0	0	0	0	0	0	0	0	1	0	0	1	1	0	1	0	Hetero	Paternal
CHM	chrX	SFARI score 3	5	no	no	no	no	no	no	no	yes	1	0	visual				0	0	0	0	0	0	0	0	0	1	0	0	0	0	1	1	0	1	0	Homo	maternal
CHMP7	chr8	Unreported	5	no	no	no	no	no	no	no	yes	1	0					0	0	0	0	1	0	0	1	0	0	0	0	0	0	2	2	0	2	0	Hetero	Both
CHTF18	chr16	Unreported	3.5	no	no	no	no	yes	no	yes	yes	3	0		neurodevelopmental			0	0	0	0	0	0	0	1	0	0	0	0	0	0	1	1	1	0	0	Hetero	maternal
CKMT1B	chr15	Unreported	1.5	no	no	yes	no	yes	no	yes	no	3	1			Postnatally		0	0	0	0	0	0	0	0	0	1	0	0	0	0	1	1	0	1	0	Hetero	maternal
CLCN2	chr3	Unreported	4.5	no	no	no	no	no	no	no	yes	1	0		brainstem morphology, myelin, oligodendrocyte, cerebellum, corpus callosum, axon, glia, brain morphology			0	0	0	0	0	1	0	0	1	0	0	0	0	0	2	2	0	2	0	Hetero	maternal
CLCN7	chr16	denovoDB	6	no	no	no	no	yes	no	no	yes	2	0		neurodevelopmental, hippocampus, astrocyte, cerebral cortex, neuron, neocortex, purkinje			0	0	0	0	0	0	0	1	0	0	0	0	0	0	1	1	0	1	0	Hetero	Paternal
CLCNKA	chr1	Unreported	2	no	no	yes	no	no	no	no	no	1	1					0	0	0	0	0	1	0	0	0	0	0	0	0	0	1	1	0	1	0	Hetero	maternal
CLDN10	chr13	Unreported	4	no	no	no	no	no	no	no	yes	1	0			Postnatally		0	0	0	0	0	0	0	0	0	0	0	0	0	1	1	1	0	1	0	Hetero	Paternal
CLEC12A	chr12	Unreported	2.5	no	no	no	no	no	no	no	yes	1	0					0	0	0	0	0	0	0	0	0	0	0	0	0	1	1	1	0	0	1	Hetero	Paternal
CLPP	chr19	Unreported	4	yes	no	no	no	no	no	yes	no	2	1	hearing	cerebral			0	1	0	0	0	0	0	0	0	0	0	0	0	0	1	1	1	0	0	Hetero	maternal
CLSPN	chr1	Unreported	5	no	no	no	no	no	no	no	yes	1	0					0	0	0	0	0	0	0	1	0	0	0	0	0	0	1	1	0	1	0	Hetero	maternal
CNTN5	chr11	SFARI score 2	4.5	yes	no	yes	no	yes	yes	no	yes	5	2	hearing		Postnatally		0	0	0	0	0	0	0	0	0	1	0	0	0	0	1	1	0	1	0	Hetero	Paternal
CNTNAP2	chr7	SFARI score 2	7.5	yes	yes	yes	yes	yes	yes	yes	yes	8	3	thermal, pain olfactory	brain wave pattern, CNS, dendrite, astrocyte, neuron, microenchalopathy corpus callosum, corpus callosum, brain development, axon	Prenatally		0	0	0	0	0	0	0	0	0	0	0	0	0	1	1	1	0	1	0	Hetero	maternal
CNTNAP5	chr2	SFARI score 3	4.5	yes	no	no	yes	yes	no	no	yes	4	1					0	0	0	0	0	0	0	1	0	0	0	0	0	0	1	1	0	1	0	Hetero	Paternal
COCH	chr14	Unreported	3.5	no	no	no	no	no	no	no	no	0	0	hearing	brainstem	Prenatally	DEG+PPI	1	0	0	0	0	0	0	0	0	0	0	0	0	0	1	1	0	0	1	Hetero	maternal
COG5	chr7	Unreported	5	no	no	no	no	no	no	no	yes	1	0		cerebellum			0	0	0	0	0	0	0	0	0	0	1	0	0	0	1	1	0	1	0	Hetero	Paternal
COG6	chr13	Unreported	5	no	no	no	yes	yes	no	no	yes	3	0					0	0	0	0	0	0	0	0	0	0	0	0	1	0	1	1	0	1	0	Hetero	maternal
COL11A1	chr1	denovoDB	7	no	no	no	no	no	no	yes	no	1	0	hearing, visual		Prenatally	DEG+PPI	0	1	0	0	0	0	0	0	0	0	0	0	0	0	1	1	0	1	0	Hetero	Paternal
COL12A1	chr6	denovoDB	8	no	no	no	yes	no	no	no	yes	2	0		nerve conduction			0	1	0	0	0	0	0	0	0	0	0	0	0	0	1	1	0	1	0	Hetero	Paternal
COL17A1	chr10	Unreported	5	no	no	no	no	no	no	no	yes	1	0					0	0	0	0	0	0	0	0	0	1	0	0	0	0	1	1	0	1	0	Hetero	maternal
COL1A1	chr17	Unreported	11	no	no	no	no	yes	yes	yes	no	3	0	hearing, visual	crania	Prenatally	DEG+PPI	1	1	0	0	1	0	0	0	0	0	0	0	0	0	3	3	0	3	0	Hetero	Paternal (66.67)
COL28A1	chr7	SFARI score 3	1	no	no	no	yes	no	no	no	yes	2	0					0	0	0	0	0	0	0	0	1	0	0	0	0	0	1	1	0	0	1	Hetero	maternal
COL4A3	chr2	Unreported	2.5	no	no	no	no	no	no	no	no	0	0	hearing	brainstem			1	0	0	0	0	0	0	0	0	0	0	0	0	0	1	1	1	0	0	Hetero	Paternal
COL6A2	chr21	Unreported	6	no	no	no	no	no	no	no	yes	1	0			Prenatally	DEG+PPI	0	0	0	0	0	0	1	0	0	0	0	0	0	0	1	1	0	1	0	Hetero	maternal
COL6A6	chr3	denovoDB	3									0						0	0	0	2	0	0	0	0	1	0	0	0	0	0	3	2	1	2	0	Hetero	Paternal
COLGALT2	chr1	Unreported	3.5	no	no	no	no	no	no	no	no	0	0	hearing				0	0	0	0	0	0	0	0	0	1	0	0	0	0	1	1	0	1	0	Hetero	maternal
COQ3	chr6	Unreported	4	no	no	no	yes	no	no	no	yes	2	0					0	0	0	0	0	0	0	0	1	0	0	0	0	0	1	1	0	1	0	Hetero	maternal
COX6B1	chr19	Unreported	4.5	no	no	no	no	yes	no	no	no	1	0	hearing	nigra			0	1	0	0	0	0	0	0	0	0	0	0	0	0	1	1	0	0	1	Hetero	maternal
CPT1A	chr11	Unreported	6.5	yes	no	no	yes	no	no	no	yes	3	1			Postnatally	DEG+PPI	0	0	0	0	0	0	0	0	0	0	1	0	0	0	1	1	0	0	1	Hetero	Paternal
CPT1B	chr22	denovoDB	8	no	no	no	no	no	no	no	no	0	0	thermal		Postnatally		0	0	0	0	0	0	0	0	1	0	0	0	0	0	1	1	0	0	1	Hetero	Paternal
CR2	chr1	Unreported	3.5									0						1	0	0	0	0	0	0	0	0	0	0	0	0	0	1	1	0	1	0	Hetero	Paternal
CRAT	chr9	Unreported	4.5									0						0	0	0	0	0	0	1	0	1	1	0	0	1	0	4	4	0	4	0	Hetero	Both
CRB1	chr1	denovoDB	12	no	no	no	no	no	no	no	yes	1	0					0	0	0	0	0	0	0	0	1	0	0	0	0	0	1	1	0	1	0	Hetero	Paternal
CRBN	chr3	Unreported	4	yes	no	no	yes	yes	no	yes	yes	5	1		long term potentiation, synapse			0	0	0	0	0	0	0	0	0	0	1	0	0	0	1	1	1	0	0	Hetero	Paternal
CREB5	chr7	denovoDB	9.5	no	no	no	no	no	yes	no	yes	2	0		dopaminergic synapse	Postnatally	DEG+PPI	0	0	0	0	0	0	0	1	0	0	0	0	0	0	1	1	0	1	0	Hetero	Paternal
CRNKL1	chr20	Unreported	5.5									0						0	0	0	0	0	0	0	0	1	0	0	0	0	0	1	1	0	1	0	Hetero	Paternal
CROT	chr7	denovoDB	2									0						0	0	0	0	0	0	0	0	0	0	1	0	0	0	1	1	0	1	0	Hetero	maternal
CSMD2	chr1	denovoDB	6	no	no	no	no	yes	yes	no	yes	3	0		cerebellar ataxia, psycho delay	Prenatally		0	1	0	0	0	0	0	0	0	0	0	0	0	0	1	1	0	1	0	Hetero	maternal
CSRP3	chr11	Unreported	6									0						0	0	0	0	0	0	0	0	0	0	0	0	0	1	1	1	0	1	0	Hetero	Paternal
CTNNA2	chr2		9.5	yes	yes	no	yes	yes	yes	yes	yes	7	2		purkinje, basal ganglia, synapse, cerebellar ataxia, dendrite, hippocampus, brain development, brain morphology, myelin, neuron, cerebellum, axon, psycho delay,			0	0	0	0	1	0	0	0	0	0	0	0	0	0	1	1	0	1	0	Hetero	Paternal
CTNND1	chr11	Unreported	9	no	no	no	no	no	no	no	yes	1	0		neuronal migration	Prenatally		0	1	0	0	0	0	0	0	0	0	0	0	0	0	1	1	0	1	0	Hetero	Paternal
CTTNBP2	chr7	SFARI score 2	5.5	yes	yes	no	yes	yes	yes	yes	no	6	2		neuron, synapse	Prenatally	DEG+PPI	0	0	0	0	0	0	0	1	0	0	0	0	0	0	1	1	0	1	0	Hetero	maternal
CUL9	chr6	denovoDB	7	no	no	no	no	no	no	no	yes	1	0					1	0	0	0	0	0	0	0	0	0	0	0	0	0	1	1	0	1	0	Hetero	Paternal
CYB561D2	chr3	Unreported	2.5									0						0	0	0	0	0	0	0	0	0	1	0	0	0	0	1	1	0	1	0	Hetero	Paternal
CYBB	chrX	Unreported	5.5	no	no	no	no	yes	no	no	yes	2	0		long term potentiation			0	0	0	0	0	0	0	0	0	0	0	1	0	0	1	1	0	1	0	Homo	maternal
CYP1B1	chr2	Unreported	5	yes	no	no	no	no	no	no	no	1	1			Postnatally		0	0	0	1	0	0	0	0	0	0	0	0	0	0	1	1	0	1	0	Hetero	maternal
CYP7A1	chr8	Unreported	4	no	no	no	no	no	no	yes	yes	2	0					0	0	0	0	0	0	0	0	0	0	0	0	0	1	1	1	0	1	0	Hetero	maternal
DACH2	chrX	Unreported	12									0				Postnatally		0	0	0	0	0	0	0	0	0	0	1	0	0	0	1	1	0	1	0	Homo	maternal
DAZAP1	chr19	Unreported	7	no	no	no	no	yes	no	no	no	1	0		neurodevelopmental			0	0	0	0	0	0	1	0	0	0	0	0	0	0	1	1	0	1	0	Hetero	Paternal
DBNL	chr7	Unreported	3.5	no	no	no	no	no	no	yes	yes	2	0		dendrite, neuron, axon, synapse			1	0	0	0	0	0	0	0	0	0	0	1	0	0	2	2	0	2	0	Hetero	Both
DBR1	chr3	denovoDB	5	no	no	no	no	no	no	no	yes	1	0			Prenatally	DEG+PPI	0	0	0	0	0	0	0	0	0	0	0	1	0	0	1	1	0	1	0	Hetero	maternal
DCDC2	chr6	Unreported	1.5	no	no	no	yes	yes	yes	no	no	3	0	hearing	dendrite, neuron,			0	0	0	0	1	0	0	0	0	0	0	0	0	0	1	1	1	0	0	Hetero	Paternal
DCTN4	chr5	Unreported	7.5	no	no	no	no	no	no	no	no	0	0					1	0	0	0	0	0	0	0	0	0	0	0	0	0	1	1	0	1	0	Hetero	Paternal
DDIAS	chr11	Unreported	1.5									0						0	0	0	0	0	0	0	1	0	0	0	0	0	0	1	1	1	0	0	Hetero	Paternal
DDOST	chr1	Unreported	4.5	no	no	no	yes	yes	no	no	no	2	0	hearing				0	0	1	0	0	0	0	0	0	0	0	0	0	0	1	1	0	1	0	Hetero	maternal
DENND4A	chr15	denovoDB	6.5	no	no	no	no	yes	no	no	no	1	0					0	0	0	0	0	0	0	0	0	0	0	0	1	0	1	1	0	1	0	Hetero	Paternal
DENND5B	chr12	denovoDB	4.5									0						0	0	0	0	0	0	0	0	1	0	0	0	0	0	1	1	0	1	0	Hetero	Paternal
DGCR6L	chr22	Unreported	3.5	yes	no	no	no	no	no	no	yes	2	1	hearing	cerebellar atrophy, osteopenia, ophthalmic anomalies, neurodevelopmental delay			0	1	0	0	0	0	0	0	0	0	0	0	0	0	1	1	0	0	1	Hetero	Paternal
DGKQ	chr4	Unreported	5	no	no	no	no	yes	no	no	yes	2	0					0	0	1	0	0	0	0	0	0	0	0	0	0	0	1	1	0	1	0	Hetero	Paternal
DHX29	chr5	denovoDB	6.5	no	no	no	no	no	no	yes	yes	2	0		neurodevelopmental, neural tube			0	0	1	0	0	0	0	0	0	0	0	0	0	0	1	1	0	1	0	Hetero	maternal
DISP1	chr1	denovoDB	2.5	no	no	no	no	no	no	no	no	0	0	skin	neural plate, neuron, crania, brain development, neural tube, neural fold, brain morphology			0	0	0	0	0	0	0	0	0	0	0	0	0	1	1	1	0	1	0	Hetero	Paternal
DIXDC1	chr11	SFARI score 3	2.5	yes	no	no	no	no	yes	yes	yes	4	1					0	0	1	0	0	0	0	0	0	0	0	0	0	0	1	1	1	0	0	Hetero	Paternal
DLD	chr7	Unreported	7	no	no	no	no	no	no	no	yes	1	0	hearing	neurodevelopmental			1	0	0	0	0	0	0	0	0	0	0	0	0	0	1	1	0	1	0	Hetero	Paternal
DLG1	chr3	SFARI score 3	4.5	no	no	no	no	no	no	no	yes	1	0		BDNF, neurotransmitter, neuron, neuromuscular, crania, synapse	Postnatally	DEG+PPI	0	0	0	0	0	0	0	0	0	1	0	0	0	0	1	1	0	1	0	Hetero	maternal
DLG2	chr11	SFARI score 2	8	yes	yes	no	no	no	no	no	yes	3	2	pain	dendrite, neurotransmitter, neuron, neuromuscular, axon, synapse	Postnatally	DEG+PPI	0	0	0	0	0	0	1	0	0	0	0	0	0	0	1	1	0	1	0	Hetero	maternal
DMBX1	chr1	denovoDB	4.5	no	no	no	no	no	no	yes	no	1	0		brain development, neural crest, neuron, CNS			0	0	0	0	0	0	0	0	1	0	0	0	0	0	1	1	0	1	0	Hetero	maternal
DMXL1	chr5	denovoDB	8	no	no	no	no	yes	no	no	yes	2	0					0	0	0	0	0	0	0	0	0	0	1	0	0	0	1	1	0	1	0	Hetero	maternal
DMXL2	chr15	SFARI score 3	7	no	no	no	no	no	no	no	yes	1	0		microenchalopathy corpus callosum			1	0	0	0	0	0	0	0	0	0	0	0	0	0	1	1	0	1	0	Hetero	Paternal
DNAH12	chr3	Unreported	2	no	no	no	no	no	no	no	yes	1	0					0	0	0	0	0	0	0	1	0	0	0	0	0	0	1	1	1	0	0	Hetero	maternal
DNAH3	chr16	SFARI score 3	4.5	no	no	no	no	no	no	no	yes	1	0		neuron			1	1	0	0	0	0	0	0	0	1	0	0	0	0	3	3	0	3	0	Hetero	maternal (66.67)
DNAH5	chr5	denovoDB	2	no	no	no	no	no	no	no	no	0	0	hearing	cerebellum, cerebral cortex, axon, neuron			0	0	0	0	0	0	0	0	0	1	0	0	0	0	1	1	0	1	0	Hetero	maternal
DNAH8	chr6	Unreported	5	no	no	no	no	no	no	no	no	0	0		axon, neuron			0	0	1	0	0	0	0	0	0	0	0	0	0	0	1	1	0	1	0	Hetero	maternal
DNAH9	chr17	denovoDB	1.5	yes	no	no	no	no	no	no	no	1	1					0	0	0	1	0	0	0	0	0	0	0	0	0	0	1	1	0	1	0	Hetero	maternal
DNAJB13	chr11	Unreported	1.5									0			axon			0	0	0	0	1	0	0	0	0	0	0	0	0	0	1	1	0	1	0	Hetero	Paternal
DNAJC10	chr2	denovoDB	3.5	yes	no	no	no	no	no	no	no	1	1					0	0	0	0	0	0	0	0	0	0	1	0	0	0	1	1	0	1	0	Hetero	Paternal
DOCK7	chr1	denovoDB	8.5	no	yes	no	yes	yes	no	no	yes	4	1	visual	neuron, corpus callosum, pons, axon, brain morphology	Prenatally	DEG+PPI	0	0	0	1	0	0	0	1	0	0	0	0	0	0	2	2	0	2	0	Hetero	Both
DOCK8	chr9	SFARI score 2	5	no	yes	no	yes	yes	no	no	yes	4	1		myelin, dendrite,			0	0	0	0	0	0	0	0	0	0	1	0	0	0	1	1	0	1	0	Hetero	maternal
DOLK	chr9	SFARI & denovoDB	6	no	no	no	no	yes	yes	no	yes	3	0	response, learning	microcephaly, cerebral, microenchalopathy corpus callosum			0	0	0	0	0	1	0	0	0	0	0	0	0	0	1	1	0	1	0	Hetero	Paternal
DPEP1	chr16	Unreported	3									0			neurotransmitter			1	0	0	0	0	0	0	0	0	0	0	0	0	0	1	1	0	1	0	Hetero	maternal
DPH6	chr15	denovoDB	5.5	no	no	no	no	no	yes	no	no	1	0					0	0	0	0	0	0	0	0	1	0	0	0	0	0	1	1	0	1	0	Hetero	Paternal
DPYD	chr1	SFARI score 3	6	yes	yes	no	yes	yes	no	yes	yes	6	2					0	0	0	0	1	0	0	0	0	0	0	1	0	0	2	2	0	2	0	Hetero	Paternal
DPYS	chr8	Unreported	4.5	no	no	no	yes	no	no	no	no	1	0					1	0	0	0	0	0	0	0	0	0	0	1	0	0	2	2	0	2	0	Hetero	Both
DSG3	chr18	denovoDB	5.5									0						0	0	0	0	0	0	0	0	1	0	0	0	0	0	1	1	0	1	0	Hetero	maternal
DSG4	chr18	Unreported	4	no	no	no	no	no	no	no	yes	1	0					0	1	0	1	0	0	0	0	1	0	0	0	0	0	3	3	0	3	0	Hetero	maternal (66.67)
DYNC1I2	chr2	Unreported	9	no	no	no	no	no	no	no	yes	1	0					0	0	0	0	0	0	0	0	0	0	0	1	0	0	1	1	0	1	0	Hetero	maternal
DYNC2H1	chr11	denovoDB	2	no	no	no	no	yes	no	no	no	1	0		crania, brain morphology			0	0	0	0	0	0	0	1	1	0	0	0	0	0	2	2	0	2	0	Hetero	Both
DYSF	chr2	denovoDB	10									0				Postnatally		0	0	0	0	0	0	0	0	0	1	0	0	0	0	1	1	0	1	0	Hetero	maternal
DZIP1	chr13	Unreported	3	no	no	no	yes	no	no	no	yes	2	0		cerebellar ataxia, psycho delay, nerve conduction, neural tube,			0	0	0	0	0	0	0	0	1	0	0	0	0	0	1	1	0	1	0	Hetero	maternal
EBF4	chr20	Unreported	1.5	yes	no	no	no	no	no	no	no	1	1			Prenatally		0	1	0	0	0	0	0	0	0	0	0	0	0	0	1	1	0	1	0	Hetero	maternal
EBNA1BP2	chr1	Unreported	4.5									0						0	0	0	0	0	0	1	0	0	0	0	0	0	0	1	1	0	0	1	Hetero	maternal
EEF2K	chr16	Unreported	4.5	no	no	no	no	no	no	no	no	0	0	response, learning	BDNF, neuron			0	0	0	0	1	0	0	0	0	0	0	0	0	0	1	1	0	1	0	Hetero	maternal
EEFSEC	chr3	Unreported	1.5	no	no	no	no	no	no	no	yes	1	0					0	0	0	0	0	0	0	1	0	0	0	1	0	0	2	2	0	2	0	Hetero	Paternal
EFCAB14	chr1	Unreported	1.5	no	no	no	no	no	no	no	yes	1	0					1	0	0	0	0	0	0	0	0	0	0	0	0	0	1	1	0	1	0	Hetero	maternal
EFHC1	chr6	Unreported	1.5	no	no	no	yes	no	no	no	yes	2	0		hippocampus, cerebral cortex,			0	0	0	0	1	0	0	0	0	0	0	0	0	0	1	1	0	1	0	Hetero	Paternal
EGR4	chr2	Unreported	1.5									0				Postnatally		0	0	0	0	0	0	0	0	0	0	0	1	0	0	1	1	1	0	0	Hetero	Paternal
EIF3K	chr19	Unreported	5.5	no	no	no	no	no	no	no	no	0	0					0	0	0	0	0	0	0	0	0	1	0	0	0	0	1	1	1	0	0	Hetero	Paternal
ELF1	chr13	Unreported	2	no	no	no	no	no	no	no	yes	1	0					0	0	0	0	0	0	0	0	0	1	0	0	0	0	1	1	0	1	0	Hetero	Paternal
ELMOD3	chr2	Unreported	3.5	no	no	no	no	no	no	yes	no	1	0	hearing	brainstem			0	0	0	0	0	0	0	0	0	0	0	0	0	1	1	1	0	1	0	Hetero	maternal
ELP4	chr11	SFARI score 2	6.5	yes	no	no	yes	no	no	no	yes	3	1		neuron,			0	1	0	0	0	0	0	0	0	0	0	0	0	0	1	1	1	0	0	Hetero	Paternal
EMC9	chr14	Unreported	2									0						0	0	0	0	0	0	0	0	0	0	0	0	0	1	1	1	1	0	0	Hetero	maternal
EMP3	chr19	Unreported	1.5									0				Postnatally	DEG+PPI	0	0	1	0	0	0	0	0	0	0	0	0	0	0	1	1	1	0	0	Hetero	maternal
ENPP7	chr17	denovoDB	2.5									0						0	0	0	0	0	0	1	0	0	0	0	0	0	0	1	1	0	1	0	Hetero	Paternal
EP300	chr22	SFARI score 1	16.5	yes	no	yes	yes	yes	yes	no	yes	6	2	pain	neurodevelopmental, NGF, neuron, neural tube	Prenatally	DEG+PPI	0	0	0	0	0	0	0	0	0	0	0	0	0	1	1	1	0	1	0	Hetero	maternal
EPHA7	chr6	Unreported	9.5	no	no	no	yes	yes	no	no	yes	3	0		CNS, neuron, brain development, axon, brain morphology	Prenatally		0	0	0	0	0	0	0	0	0	0	0	0	1	0	1	1	0	1	0	Hetero	maternal
EPHB1	chr3	denovoDB	10	no	no	yes	no	yes	no	no	yes	3	1	pain	CNS, dendrite, neural crest, neurotransmitter, neuron, axon, synapse, brain morphology	Prenatally		0	0	0	0	0	0	0	0	1	0	0	0	0	0	1	1	0	1	0	Hetero	maternal
EPHB3	chr3	Unreported	11.5	no	no	no	no	no	no	no	yes	1	0		dendrite, neural crest, neurotransmitter, neuron, axon, synapse	Postnatally		0	0	0	0	0	1	0	0	0	0	0	0	0	0	1	1	0	1	0	Hetero	maternal
EPN2	chr17	denovoDB	1.5	no	no	no	no	no	no	no	yes	1	0					0	0	0	1	0	0	0	0	0	0	0	0	0	0	1	1	0	1	0	Hetero	Paternal
EPN3	chr17	Unreported	4.5									0						0	0	0	0	0	0	0	0	0	0	0	1	0	0	1	1	0	1	0	Hetero	maternal
EPPK1	chr8	SFARI score 3	2.5									0						0	1	1	0	0	0	0	0	0	0	0	0	0	0	2	2	1	1	0	Hetero	maternal
EPYC	chr12	Unreported	1.5									0			brainstem			1	0	0	0	1	0	0	0	0	0	0	0	0	0	2	2	0	2	0	Hetero	maternal
ESR1	chr6	Unreported	11.5	yes	yes	no	yes	yes	yes	yes	yes	7	2	pain	hypothalamus			1	0	0	0	0	0	0	0	0	0	0	0	0	0	1	1	0	1	0	Hetero	maternal
ESYT1	chr12	denovoDB	4.5	no	no	no	no	no	no	no	yes	1	0			Postnatally		0	0	1	0	0	0	0	0	0	0	0	0	0	0	1	1	0	1	0	Hetero	Paternal
EVI5	chr1	Unreported	3.5									0						0	0	0	0	0	0	0	0	1	0	0	0	0	0	1	1	0	1	0	Hetero	maternal
EXOC7	chr17	Unreported	9	no	no	no	no	no	no	no	yes	1	0					0	0	0	1	0	0	0	0	0	0	0	0	0	0	1	1	1	0	0	Hetero	maternal
EXOG	chr3	Unreported	2									0						0	0	0	0	0	0	0	0	1	0	0	0	0	0	1	1	1	0	0	Hetero	Paternal
F13A1	chr6	denovoDB	2	no	no	no	no	no	no	no	yes	1	0			Postnatally		0	0	0	0	0	0	0	0	0	0	0	1	0	0	1	1	0	1	0	Hetero	Paternal
F2RL1	chr5	Unreported	4	yes	no	no	no	no	no	yes	yes	3	1	pain	dendrite, cerebral, neuron,			0	0	0	0	0	0	0	0	1	0	0	0	0	0	1	1	0	1	0	Hetero	Paternal
F5	chr1	Unreported	2	no	no	no	no	no	no	no	yes	1	0	pain	microenchalopathy corpus callosum			0	0	0	0	0	0	0	0	0	0	0	1	0	0	1	1	0	1	0	Hetero	Paternal
FAH	chr15	Unreported	5.5	no	no	no	no	no	no	no	yes	1	0					0	1	0	0	0	0	0	0	0	0	0	0	0	0	1	1	0	1	0	Hetero	maternal
FAHD2A	chr2	Unreported	3									0						0	0	0	0	0	1	0	0	0	0	0	0	0	0	1	1	0	1	0	Hetero	maternal
FAM20A	chr17	Unreported	1.5	no	no	no	yes	no	no	no	no	1	0					0	0	0	0	0	0	0	1	0	0	0	0	0	0	1	1	0	1	0	Hetero	maternal
FANCG	chr9	Unreported	4	no	no	no	no	yes	no	no	no	1	0			Prenatally		0	0	0	0	0	0	0	1	0	0	0	0	0	0	1	1	0	1	0	Hetero	Paternal
FARP1	chr13	denovoDB	1.5	no	no	no	yes	no	no	yes	yes	3	0		dendrite, neuron, synapse	Prenatally		0	0	0	0	0	0	0	0	1	0	0	0	0	0	1	1	0	1	0	Hetero	maternal
FASN	chr17	denovoDB	11	no	yes	no	no	no	yes	no	yes	3	1		neurodevelopmental	Prenatally	DEG+PPI	0	0	0	0	0	0	0	0	0	0	0	0	1	0	1	1	0	1	0	Hetero	maternal
FAT1	chr4	SFARI score 3	3.5	no	no	no	no	no	no	no	yes	1	0		nerve conduction	Postnatally		0	1	0	0	0	0	0	0	1	0	0	0	0	0	2	2	0	2	0	Hetero	Paternal
FBLN2	chr3	Unreported	5									0				Postnatally		1	0	0	0	0	0	0	1	0	0	0	1	0	0	3	3	1	2	0	Hetero	Paternal
FBN3	chr19	denovoDB	3	no	no	no	yes	no	no	no	no	1	0			Prenatally	DEG+PPI	0	0	0	0	0	0	0	0	0	0	1	0	0	0	1	1	0	1	0	Hetero	maternal
FBP2	chr9	Unreported	1.5	no	no	no	yes	no	no	yes	no	2	0					0	1	0	0	0	0	0	0	0	0	0	0	0	0	1	1	0	1	0	Hetero	maternal
FBXO36	chr2	Unreported	3.5									0						0	0	0	0	0	0	0	0	0	0	0	1	0	0	1	1	0	1	0	Hetero	maternal
FBXW4	chr10	Unreported	5	no	no	no	no	no	no	no	yes	1	0			Postnatally		0	1	0	0	0	0	0	0	0	0	0	0	0	0	1	1	0	1	0	Hetero	maternal
FBXW8	chr12	Unreported	4	no	no	no	no	yes	no	no	no	1	0		dendrite, neuron, brain morphology			0	0	0	0	0	0	0	0	0	0	0	1	0	0	1	1	0	1	0	Hetero	maternal
FERMT1	chr20	denovoDB	4	no	no	no	no	no	no	no	yes	1	0		neuronal migration			0	0	0	0	0	0	1	0	0	0	0	0	0	0	1	1	1	0	0	Hetero	Paternal
FGFR3	chr4	Unreported	11.5	no	no	no	no	yes	yes	no	yes	3	0	hearing	neural crest, crania, neuronal migration, microenchalopathy corpus callosum, brainstem, foramen magnum	Postnatally	DEG+PPI	0	0	0	0	0	0	0	0	0	0	0	0	0	1	1	1	1	0	0	Hetero	maternal
FGL1	chr8	Unreported	1.5									0						0	0	0	1	0	0	0	0	0	0	0	0	0	0	1	1	0	1	0	Hetero	Paternal
FITM1	chr14	Unreported	1.5									0						0	0	1	0	0	0	0	0	0	0	0	0	0	0	1	1	0	1	0	Hetero	maternal
FLII	chr17	denovoDB	9	no	no	yes	yes	yes	no	no	yes	4	1	pain	neuronal migration,			0	0	1	0	0	0	0	0	0	0	0	0	0	0	1	1	0	1	0	Hetero	Paternal
FLNB	chr3	denovoDB	13	no	no	no	no	no	no	no	yes	1	0	hearing	neuronal migration, crania, brain morphology			0	0	0	0	0	0	0	0	0	0	0	1	2	0	3	2	0	3	0	Hetero	maternal
FLRT1	chr11	denovoDB	4.5	no	no	no	no	no	no	no	yes	1	0		neuron			0	0	1	0	0	0	0	0	0	0	0	0	0	0	1	1	0	1	0	Hetero	Paternal
FMN1	chr15	Unreported	6									0						0	0	0	0	0	0	0	1	0	0	0	0	0	0	1	1	1	0	0	Homo	Paternal
FMNL1	chr17	Unreported	6.5	no	no	no	no	no	no	no	yes	1	0			Postnatally	DEG+PPI	0	0	0	0	0	0	0	0	0	0	1	0	0	0	1	1	1	0	0	Hetero	maternal
FN1	chr2	denovoDB	10.5	no	no	no	yes	no	no	no	yes	2	0		neuroithelium, neural crest, neuron, neuronal migration, ilssy, neural tube,	Prenatally	DEG+PPI	0	0	0	0	0	0	0	0	0	0	1	0	0	0	1	1	1	0	0	Hetero	Paternal
FOCAD	chr9	denovoDB	3	no	no	no	no	no	no	yes	no	1	0					0	0	0	0	1	0	0	0	0	0	0	0	0	0	1	1	0	1	0	Hetero	maternal
FOLR1	chr11	Unreported	3.5	no	yes	no	no	no	no	no	no	1	1		neuroithelium, neural crest, neuron, neuropore closure, axon, neural tube, brain morphology	Postnatally		0	0	0	0	0	0	0	0	0	0	0	1	0	0	1	1	0	0	1	Hetero	maternal
FOXD4L1	chr2	Unreported	2.5									0						0	0	0	0	0	0	0	0	0	0	0	0	1	0	1	1	0	1	0	Hetero	Paternal
FOXN1	chr17	denovoDB	6.5	yes	no	no	no	yes	no	no	no	2	1		brainstem, ganglion			0	0	0	0	0	0	0	0	0	0	0	0	1	0	1	1	0	1	0	Hetero	maternal
FRAS1	chr4	denovoDB	4	no	no	no	yes	no	no	no	yes	2	0					0	0	0	1	0	0	0	1	0	0	0	0	1	0	3	3	0	3	0	Hetero	Paternal (66.67)
FSTL4	chr5	Unreported	4.5	no	no	no	no	no	yes	no	no	1	0			Postnatally		0	0	0	0	1	0	0	0	0	0	0	0	0	0	1	1	0	1	0	Hetero	Paternal
FUBP3	chr9	Unreported	7									0						0	1	0	0	0	0	0	0	0	0	0	0	0	0	1	1	0	1	0	Hetero	Paternal
FZD2	chr17	denovoDB	7									0			neuron	Prenatally		0	0	0	0	0	0	0	0	0	0	0	1	0	0	1	1	0	1	0	Hetero	maternal
FZD4	chr11	Unreported	6	no	no	no	no	no	no	yes	no	1	0	hearing	dendrite, astrocyte, neuron, purkinje, cerebellum, brainstem, brain morphology			0	0	0	0	0	0	0	0	0	0	0	0	0	1	1	1	0	1	0	Homo	Paternal
GAA	chr17	Unreported	6	no	no	no	no	no	no	yes	no	1	0		neuronal migration			0	0	0	0	0	0	0	0	0	0	1	0	0	0	1	1	0	1	0	Hetero	Paternal
GABRB3	chr15	SFARI score 1	7.5	yes	yes	yes	no	yes	yes	yes	yes	7	3	hearing	cerebellar ataxia, neurotransmission, psycho delay, BDNF, hippocampus, neuron, neurotransmitter, ganglion, brainstem, synapse	Prenatally		0	0	0	1	0	0	0	0	0	0	0	0	0	1	2	2	2	0	0	Hetero	maternal
GAK	chr4	denovoDB	6.5	no	no	no	no	yes	no	no	yes	2	0		neuron, synapse			0	0	0	0	0	0	0	0	1	0	0	0	0	0	1	1	0	1	0	Hetero	Paternal
GALC	chr14	Unreported	4	no	no	no	no	no	no	no	yes	1	0		CNS, myelin, astrocyte, neuron, oligodendrocyte, corpus callosum, pons, axon, glia, brain morphology			1	0	0	0	0	0	0	0	0	0	0	0	0	0	1	1	0	1	0	Hetero	maternal
GALNT7	chr4	Unreported	5	no	no	no	no	no	no	no	yes	1	0					0	0	0	0	0	0	0	0	0	0	0	1	0	0	1	1	0	1	0	Hetero	Paternal
GANAB	chr11	Unreported	5.5	no	no	no	no	no	no	no	yes	1	0		neuronal migration,			0	1	0	0	0	0	0	0	0	0	0	0	0	0	1	1	0	1	0	Hetero	maternal
GAPVD1	chr9	denovoDB	9.5									0						1	0	0	0	0	0	0	0	0	0	0	0	0	0	1	1	0	1	0	Hetero	maternal
GAS8	chr16	Unreported	2									0			axon			0	0	0	0	0	0	0	1	0	0	0	0	0	0	1	1	1	0	0	Hetero	Paternal
GATM	chr15	SFARI & denovoDB	3	yes	no	no	yes	yes	yes	yes	no	5	1	hypersensitivity		Postnatally		0	0	0	0	1	0	0	0	0	0	0	0	0	0	1	1	0	1	0	Hetero	maternal
GCA	chr2	Unreported	2									0						0	0	0	1	0	0	0	0	0	0	0	0	0	0	1	1	0	0	1	Hetero	maternal
GCNT4	chr5	Unreported	1.5									0						0	0	1	0	0	0	0	0	0	0	0	0	0	0	1	1	1	0	0	Hetero	Paternal
GDF3	chr12	Unreported	3.5	no	no	no	no	no	no	no	no	0	0	sensory				0	0	0	0	0	0	0	0	0	0	0	0	0	1	1	1	0	1	0	Hetero	maternal
GHSR	chr3	Unreported	3	no	no	no	no	yes	no	yes	no	2	0		neuron, hypothalamus			0	0	1	0	0	0	0	0	0	0	0	0	0	0	1	1	0	1	0	Hetero	Paternal
GINS1	chr20	Unreported	4.5									0				Prenatally		0	1	0	0	0	0	0	0	0	0	0	0	0	0	1	1	1	0	0	Hetero	Paternal
GJB3	chr1	Unreported	5	no	no	no	no	no	no	no	no	0	0	hearing				0	0	0	0	0	0	0	0	0	0	0	0	1	0	1	1	1	0	0	Hetero	maternal
GLB1	chr3	Unreported	3.5	no	no	no	yes	yes	no	yes	yes	4	0	hypersensitivity	brainstem morphology, neuron, purkinje, cerebellum, brain morphology			0	0	0	0	0	0	0	0	0	1	0	0	0	0	1	1	0	1	0	Hetero	maternal
GLB1L	chr2	Unreported	1.5									0						0	1	0	0	0	0	0	0	0	0	0	0	0	1	2	2	0	2	0	Hetero	maternal
GLI2	chr2	Unreported	10	no	no	no	no	yes	no	no	no	1	0		myelin, neuron, nerve conduction, dopaminergic neuron, cerebellum, microenchalopathy corpus callosum, corpus callosum, axon, microcephaly, neural tube	Prenatally	DEG+PPI	0	0	0	0	0	0	1	0	0	0	0	0	0	1	2	2	0	2	0	Hetero	maternal
GLIS1	chr1	SFARI score 3	4									0						0	0	1	0	0	0	0	0	0	0	0	0	0	0	1	1	0	1	0	Hetero	Paternal
GLT8D1	chr3	Unreported	2	no	no	no	no	no	yes	no	yes	2	0					0	0	0	0	0	0	0	1	0	0	0	0	0	0	1	1	0	1	0	Hetero	maternal
GM2A	chr5	Unreported	2.5	no	yes	no	no	yes	no	no	yes	3	1		hypothalamus, amygdala, cerebral cortex, purkinje, cerebellum, brain morphology	Postnatally		0	0	0	1	0	0	0	0	0	0	0	0	0	1	2	2	0	2	0	Hetero	Both
GMFG	chr19	Unreported	4									0				Postnatally		1	0	0	0	0	0	0	0	0	0	0	0	0	0	1	1	1	0	0	Hetero	Paternal
GMPR2	chr14	Unreported	3									0						0	0	0	0	0	0	0	0	0	0	0	0	0	1	1	1	1	0	0	Hetero	Paternal
GNA14	chr9	Unreported	2.5	no	no	no	yes	no	no	no	yes	2	0					0	0	0	0	1	0	0	0	0	0	0	0	0	0	1	1	0	1	0	Hetero	Paternal
GNAT2	chr1	Unreported	2.5	no	no	no	no	no	no	no	no	0	0	visual				0	0	0	0	0	1	0	0	0	0	0	0	0	0	1	1	0	1	0	Hetero	Paternal
GNE	chr9	Unreported	8.5	no	no	no	yes	yes	no	no	yes	3	0		neural tube			0	0	1	0	0	0	0	0	0	0	0	0	0	0	1	1	0	1	0	Hetero	Paternal
GNPTAB	chr12	denovoDB	7	no	no	no	yes	yes	no	no	no	2	0		myelin, hippocampus, astrocyte, purkinje, cerebellum, axon, brain morphology	Prenatally		0	0	0	0	0	0	0	1	0	0	0	0	0	0	1	1	0	1	0	Hetero	maternal
GOLGA6L2	chr15	denovoDB	2.5									0						0	0	0	0	0	1	0	0	0	0	0	0	0	0	1	1	1	0	0	Hetero	maternal
GOSR2	chr17	Unreported	4.5	no	no	no	no	no	no	no	yes	1	0					0	1	0	0	0	0	0	0	0	0	0	0	0	0	1	1	0	1	0	Hetero	maternal
GPATCH4	chr1	Unreported	3.5									0						0	1	0	0	0	0	0	0	0	0	0	0	0	0	1	1	1	0	0	Hetero	Paternal
GPC1	chr2	Unreported	4	no	no	no	no	no	no	no	yes	1	0		schwann, myelin, brain development, axon, PNS, glia, brain morphology			0	0	0	0	0	0	0	0	0	0	0	0	0	1	1	1	0	1	0	Hetero	maternal
GPR141	chr7	Unreported	2	yes	no	no	no	no	no	no	no	1	1					0	0	1	0	0	0	0	0	0	0	0	0	0	0	1	1	1	0	0	Hetero	Paternal
GPR151	chr5	Unreported	1.5	no	yes	no	no	no	no	no	no	1	1					0	0	0	0	0	0	1	0	0	0	0	0	0	0	1	1	1	0	0	Hetero	Paternal
GPR61	chr1	Unreported	4									0				Postnatally	DEG+PPI	0	1	0	0	0	0	0	0	0	0	0	0	0	0	1	1	0	1	0	Hetero	maternal
GPR75	chr2	Unreported	3.5									0			neurodevelopmental, neuron			0	0	0	0	0	0	0	0	0	0	0	0	1	0	1	1	0	1	0	Hetero	maternal
GPR83	chr11	denovoDB	1.5	no	no	no	no	yes	yes	yes	yes	4	0		neuron	Postnatally		0	0	1	0	1	0	0	0	0	0	0	0	0	0	2	2	1	1	0	Hetero	Both
GPSM1	chr9	denovoDB	5	no	no	no	no	no	no	no	no	0	0	hypersensitivity		Prenatally		0	0	0	0	0	0	0	0	0	0	0	0	2	0	2	1	0	2	0	Hetero	maternal
GRAMD2A	chr15	Unreported	2.5									0						0	1	0	0	0	0	0	0	0	0	0	0	0	0	1	1	0	1	0	Hetero	maternal
GRIN3A	chr9	Unreported	3	no	no	no	no	no	no	no	yes	1	0	pain	dendrite, neurotransmitter, neuron, cerebellum, synapse	Postnatally		0	0	0	0	0	0	0	1	0	0	0	0	0	0	1	1	0	1	0	Hetero	maternal
GSS	chr20	Unreported	7	no	yes	no	no	no	no	no	yes	2	1	hearing	neuron,			0	0	0	0	0	0	0	0	0	0	0	1	0	0	1	1	1	0	0	Hetero	Paternal
GTPBP4	chr10	denovoDB	4.5	no	no	no	no	no	no	no	yes	1	0		neurodevelopmental			0	0	1	0	0	0	0	0	0	0	0	0	0	0	1	1	0	1	0	Hetero	maternal
HACL1	chr3	Unreported	1.5									0						0	0	0	0	0	0	0	0	0	0	0	2	0	0	2	1	0	2	0	Hetero	Paternal
HADHA	chr2	denovoDB	4.5	no	no	no	no	yes	no	no	no	1	0					0	0	0	0	0	0	0	0	0	1	0	0	0	0	1	1	0	1	0	Hetero	Paternal
HDAC2	chr6	Unreported	7.5	yes	no	no	no	yes	no	no	yes	3	1		hippocampus, neural crest, neuron, dentate gyrus, brain development, long term potentiation	Prenatally	DEG+PPI	0	0	0	1	0	0	0	0	0	0	0	0	0	0	1	1	0	1	0	Hetero	Paternal
HEATR1	chr1	denovoDB	4	no	no	no	yes	no	no	no	yes	2	0		neurodevelopmental, microenchalopathy corpus callosum,			1	0	0	0	0	0	0	0	0	0	0	0	0	0	1	1	0	1	0	Hetero	Paternal
HGS	chr17	Unreported	7	no	yes	yes	no	no	no	no	yes	3	2	response	neurodevelopmental, cerebellar atrophy, CNS, myelin, osteopenia, neuron, ophthalmic anomalies, purkinje, cerebellum, axon, brain development, neurodevelopmental delay, neural tube, glia, brain morphology			0	0	0	0	0	0	0	0	0	1	0	0	0	0	1	1	1	0	0	Hetero	Paternal
HIPK1	chr1	Unreported	11	no	no	no	no	no	no	no	no	0	0	sensory organ development	neural tube,			0	0	0	0	0	0	0	0	0	0	0	0	1	0	1	1	0	1	0	Hetero	maternal
HIPK2	chr7	Unreported	5	no	no	no	no	no	no	no	yes	1	0	response, sensory organ development	dopaminergic neuron, neural tube, neuron	Postnatally	DEG+PPI	0	0	0	0	0	0	0	0	0	0	0	0	1	0	1	1	0	1	0	Hetero	Paternal
HIVEP2	chr6	SFARI score 1	11	yes	yes	no	no	yes	no	yes	yes	5	2	pain, visual	brain wave pattern, CNS, hippocampus, astrocyte, cerebral cortex, dendrite, oligodendrocyte, neuron, cerebellum, dentate gyrus, synapse			1	0	0	0	0	0	0	0	0	0	0	0	0	0	1	1	0	1	0	Hetero	maternal
HKDC1	chr10	denovoDB	4									0						0	0	0	1	0	0	0	0	0	1	0	0	1	1	4	4	0	4	0	Hetero	maternal (75)
HLTF	chr3	Unreported	4.5	no	no	no	no	no	no	no	no	0	0		NPC, neuron			0	0	0	0	0	1	0	0	0	0	0	0	0	0	1	1	0	1	0	Hetero	Paternal
HMBS	chr11	denovoDB	9	no	no	no	no	no	yes	yes	yes	3	0	pain	myelin, axon, brain morphology			0	0	0	0	0	0	0	0	0	0	1	0	0	0	1	1	0	1	0	Hetero	maternal
HMCN2	chr9	denovoDB	3.5									0						0	0	0	0	0	0	0	0	0	0	1	0	0	0	1	1	0	0	1	Hetero	maternal
HMGA2	chr12	Unreported	5	yes	no	no	yes	yes	yes	no	yes	5	1			Prenatally	DEG+PPI	0	0	0	0	0	1	0	0	0	0	0	0	0	0	1	1	0	0	1	Hetero	maternal
HMX2	chr10	Unreported	5	no	no	no	no	no	no	yes	no	1	0		hypothalamus			0	0	0	0	0	0	1	0	0	1	0	0	0	0	2	2	0	2	0	Hetero	Both
HOXD3	chr2	Unreported	8.5									0			neuron			0	1	0	0	0	0	0	0	0	0	0	0	0	0	1	1	0	1	0	Hetero	maternal
HPSE2	chr10	Unreported	4.5	no	no	no	yes	no	no	no	no	1	0					0	0	0	0	0	0	0	0	0	0	1	0	0	0	1	1	0	1	0	Hetero	maternal
HS2ST1	chr1	Unreported	6.5									0						0	0	0	0	0	1	0	0	0	0	0	0	0	0	1	1	0	1	0	Hetero	maternal
HS6ST1	chr2	denovoDB	4									0			neuron			0	0	0	0	0	0	0	0	0	1	0	0	0	0	1	1	0	1	0	Hetero	Paternal
HS6ST2	chrX	Unreported	3.5									0				Postnatally		0	0	0	0	0	0	0	0	0	0	0	1	0	0	1	1	1	0	0	Homo	maternal
HSPA13	chr21	denovoDB	2	no	no	no	no	no	no	no	yes	1	0		myelin, basal ganglia	Prenatally		0	0	0	1	0	0	0	0	0	0	0	0	0	0	1	1	0	1	0	Hetero	Paternal
HTR2B	chr2	denovoDB	2	no	yes	no	no	no	no	no	yes	2	1		dendrite, neural crest, neuron, synapse			0	0	0	0	0	0	0	1	0	0	0	0	0	0	1	1	0	1	0	Hetero	maternal
IFFO2	chr1	Unreported	1.5									0						0	0	0	0	0	0	0	0	0	0	0	0	1	0	1	1	0	1	0	Hetero	maternal
IGF2	chr11	Unreported	4.5	yes	no	no	no	yes	no	no	no	2	1	pain	neuronal migration	Postnatally	DEG+PPI	0	0	0	0	0	0	0	0	1	0	0	0	0	0	1	1	1	0	0	Hetero	maternal
IGSF21	chr1	Unreported	4	yes	no	no	yes	no	no	no	yes	3	1		synapse			0	0	0	0	0	0	0	0	1	0	0	0	0	0	1	1	0	1	0	Hetero	Paternal
IKZF2	chr2	denovoDB	7.5									0						0	0	0	0	0	1	0	0	0	0	0	0	0	0	1	1	1	0	0	Hetero	Paternal
IMMP1L	chr11	Unreported	4									0						0	0	0	0	0	0	0	0	0	1	0	0	0	0	1	1	1	0	0	Hetero	Paternal
INSC	chr11	denovoDB	3	no	no	no	yes	no	no	no	no	1	0					0	0	0	0	0	0	0	0	0	0	1	0	0	0	1	1	0	1	0	Hetero	Paternal
INSRR	chr1	denovoDB	4.5									0			axon, neuron			0	0	0	0	1	0	0	0	0	0	0	0	0	0	1	1	0	1	0	Hetero	maternal
INTS7	chr1	denovoDB	6.5	no	no	no	yes	no	no	no	yes	2	0			Prenatally	DEG+PPI	0	0	1	0	0	0	0	0	0	0	0	0	0	0	1	1	0	1	0	Hetero	maternal
IPO9	chr1	Unreported	7	yes	no	no	no	no	no	yes	no	2	1		neurodevelopmental,, brain development, neural tube			0	0	0	0	0	0	0	0	0	0	0	1	0	0	1	1	0	1	0	Hetero	Paternal
IQGAP3	chr1	SFARI score 3	4	yes	no	no	no	no	no	no	no	1	1		microenchalopathy corpus callosum	Prenatally		1	0	0	0	0	0	0	0	0	0	0	0	0	0	1	1	0	1	0	Hetero	maternal
IREB2	chr15	denovoDB	7.5	no	no	no	yes	no	no	yes	no	2	0	pain	hippocampus, cerebral cortex, oligodendrocyte, purkinje, cerebellum, axon, corpus callosum, thalamus,			0	1	0	0	0	0	0	0	0	0	0	0	0	0	1	1	0	1	0	Hetero	maternal
IRS1	chr2	denovoDB	10.5	no	no	no	no	yes	no	no	yes	2	0		brainstem, BDNF, neurotransmitter, neuron	Prenatally		1	0	0	0	0	0	0	0	0	0	0	0	0	0	1	1	0	1	0	Hetero	Paternal
ITGB4	chr17	Unreported	10									0			neuron	Postnatally	DEG+PPI	0	0	1	0	0	0	0	0	0	0	0	0	0	0	1	1	0	1	0	Hetero	Paternal
ITIH1	chr3	Unreported	3	no	no	no	no	no	no	no	yes	1	0					0	0	1	0	0	0	0	0	0	0	0	0	0	0	1	1	0	0	1	Hetero	Paternal
IVD	chr15	Unreported	1.5									0						0	0	0	1	0	0	0	0	0	0	0	0	0	0	1	1	1	0	0	Hetero	maternal
JAG1	chr20	Unreported	13.5	no	no	yes	no	yes	no	no	no	2	1		neuron, neural tube, NPC			0	0	0	0	0	0	0	0	0	0	0	0	0	1	1	1	0	1	0	Hetero	Paternal
JAK2	chr9	Unreported	7.5	yes	yes	no	no	no	yes	no	yes	4	2	pain	neurotransmission, BDNF, cerebral, neuron, dopaminergic neuron, synapse			0	0	0	0	0	0	1	0	0	0	0	0	0	0	1	1	0	1	0	Hetero	maternal
KALRN	chr3	Unreported	7.5	no	yes	no	yes	yes	yes	yes	yes	6	1		hippocampus, dendrite, cerebral cortex, neuron, synapse, long term potentiation, axon,	Postnatally	DEG+PPI	0	0	0	0	0	0	0	0	0	1	0	0	0	0	1	1	0	1	0	Hetero	Paternal
KAT14	chr20	Unreported	2.5	no	no	no	no	no	no	no	no	0	0					0	0	1	0	0	0	0	0	0	0	0	0	0	0	1	1	1	0	0	Hetero	maternal
KAT6B	chr10	SFARI score 3	9.5	no	no	no	yes	no	no	no	no	1	0		microenchalopathy corpus callosum	Prenatally	DEG+PPI	0	0	1	0	0	0	0	0	0	0	0	0	0	0	1	1	0	1	0	Hetero	Paternal
KCNE2	chr21	Unreported	4	yes	no	no	no	no	no	no	yes	2	1					0	0	0	0	0	0	0	0	1	0	0	0	0	0	1	1	0	1	0	Hetero	Paternal
KCNH2	chr7	Unreported	12	no	no	no	no	no	no	no	yes	1	0		crania			0	0	0	0	0	0	0	0	0	0	0	1	0	0	1	1	0	1	0	Hetero	Paternal
KCNJ14	chr19	Unreported	2.5									0			synapse			0	0	0	0	0	0	0	0	1	0	0	0	0	0	1	1	0	1	0	Hetero	maternal
KCNJ16	chr17	Unreported	3	no	no	no	no	no	yes	no	yes	2	0		neuron	Postnatally		0	0	1	0	0	0	0	0	0	0	0	0	0	0	1	1	1	0	0	Hetero	Paternal
KCNS3	chr2	SFARI score 2	2	no	no	no	no	yes	no	no	yes	2	0					0	0	0	0	0	0	1	0	0	1	0	0	0	0	2	2	0	2	0	Hetero	Both
KDELR3	chr22	Unreported	1.5									0						0	0	0	0	0	0	0	1	0	0	0	0	0	0	1	1	0	1	0	Hetero	maternal
KHK	chr2	denovoDB	4.5									0						0	1	0	0	0	0	0	0	0	0	0	0	0	0	1	1	0	1	0	Hetero	Paternal
KIAA0586	chr14	denovoDB	3.5	no	no	no	no	yes	no	no	yes	2	0		neural tube			0	0	1	0	0	0	0	0	0	0	0	0	0	0	1	1	0	1	0	Hetero	maternal
KIF12	chr9	Unreported	3.5	no	no	no	yes	no	no	no	no	1	0					0	0	0	0	1	0	0	0	0	0	0	0	0	0	1	1	0	1	0	Hetero	maternal
KIF1B	chr1	Unreported	9.5	yes	yes	no	no	yes	no	yes	yes	5	2	sensory	brainstem morphology, myelin, dendrite, hippocampus, neuron, microenchalopathy corpus callosum, axon, synapse, brain morphology			0	1	0	0	0	0	0	0	0	1	0	1	0	0	3	3	0	3	0	Hetero	Paternal
KIF20B	chr10	Unreported	4	no	no	no	no	no	no	no	no	0	0		dendrite, cerebral cortex, neuron, microenchalopathy corpus callosum, NPC, microcephaly, axon, brain morphology			0	1	0	1	0	0	0	0	0	0	0	0	0	0	2	2	1	1	0	Hetero	Both
KLHL10	chr17	Unreported	5									0						0	0	0	0	0	0	1	0	0	0	0	0	0	0	1	1	0	1	0	Hetero	Paternal
KLHL30	chr2	denovoDB	1.5									0						0	0	0	0	0	1	0	0	0	0	0	0	0	0	1	1	0	1	0	Hetero	maternal
KLHL38	chr8	Unreported	1.5									0						0	0	0	0	1	0	0	0	0	0	0	0	1	0	2	2	0	2	0	Hetero	Both
KMT2C	chr7	SFARI score 1	7.5	yes	no	no	no	no	no	no	yes	2	1					0	1	0	0	0	0	0	0	0	0	1	0	0	0	2	2	0	2	0	Hetero	Both
KRIT1	chr7	Unreported	6.5	no	no	no	no	no	no	no	yes	1	0		brain development, neuronal migration, neural tube,			0	0	0	1	0	0	0	0	0	0	0	0	0	0	1	1	0	1	0	Hetero	maternal
KRT10	chr17	denovoDB	2									0						0	0	0	0	0	0	0	0	0	0	0	0	1	0	1	1	0	1	0	Hetero	Paternal
KRT75	chr12	denovoDB	2	no	no	yes	no	no	no	no	no	1	1					0	0	0	0	0	0	0	0	0	0	1	0	0	0	1	1	0	1	0	Hetero	Paternal
L3MBTL1	chr20	denovoDB	1.5									0						0	1	0	0	0	0	0	0	0	0	0	0	0	1	2	2	0	2	0	Hetero	maternal
LAMA1	chr18	SFARI score 3	3.5	yes	yes	no	yes	no	yes	yes	no	5	2		synapse, cerebellum, axon			0	1	0	0	0	0	0	0	0	0	0	0	0	0	1	1	0	1	0	Hetero	maternal
LAMB1	chr7	SFARI score 2	7.5	yes	no	no	no	no	no	no	no	1	1		neuron, nerve conduction, neuronal migration, cerebellum, synapse			0	0	0	0	0	0	1	0	0	0	0	0	0	0	1	1	0	1	0	Hetero	maternal
LAMB2	chr3	denovoDB	7.5	no	no	no	no	no	no	no	yes	1	0		neuron, neuronal migration, progressive postnatal microcephaly, synapse, midline hand movements	Postnatally	DEG+PPI	0	0	0	0	1	0	0	0	0	0	0	0	0	0	1	1	0	1	0	Hetero	maternal
LAMC2	chr1	Unreported	4	yes	yes	no	no	yes	no	no	yes	4	2		axon, synapse			0	0	0	0	1	0	0	0	0	0	0	0	0	0	1	1	0	1	0	Hetero	maternal
LARGE2	chr11	Unreported	3									0						0	0	0	0	0	0	0	0	0	0	0	0	1	0	1	1	1	0	0	Hetero	maternal
LARP1	chr5	denovoDB	8	yes	no	no	no	no	no	no	yes	2	1		neurodevelopmental, microenchalopathy corpus callosum,			1	0	0	0	0	0	0	0	0	0	0	0	0	0	1	1	0	0	1	Hetero	maternal
LDLRAD4	chr18	Unreported	1.5	no	no	no	no	yes	no	no	no	1	0					0	0	0	0	0	0	0	0	0	0	0	0	1	0	1	1	0	1	0	Hetero	maternal
LEMD3	chr12	denovoDB	7	no	no	no	yes	yes	no	no	no	2	0					0	1	0	0	0	0	0	0	0	0	0	0	0	0	1	1	0	1	0	Hetero	Paternal
LEXM	chr1	Unreported	2.5									0						0	0	1	1	0	0	0	0	0	0	0	0	0	0	2	2	2	0	0	Hetero	Both
LHFPL4	chr3	Unreported	2	yes	no	no	no	no	no	no	no	1	1	hearing	cerebellar ataxia, psycho delay, neurotransmitter, synapse	Prenatally		0	0	1	0	0	0	0	0	0	0	0	0	0	0	1	1	0	1	0	Hetero	Paternal
LIMA1	chr12	denovoDB	4	no	no	no	no	yes	no	no	yes	2	0					0	0	0	0	0	0	0	0	0	1	0	0	0	0	1	1	0	1	0	Hetero	Paternal
LINGO4	chr1	Unreported	3.5									0						0	0	0	0	0	0	0	0	0	0	1	1	0	0	2	2	0	2	0	Hetero	Paternal
LIPT2	chr11	denovoDB	3.5									0						0	0	0	0	0	0	0	0	0	0	0	0	0	1	1	1	0	1	0	Hetero	maternal
LMAN1	chr18	Unreported	2	no	no	no	yes	no	no	no	yes	2	0					0	0	0	0	0	0	0	0	0	0	0	0	0	1	1	1	0	1	0	Hetero	maternal
LMCD1	chr3	Unreported	1.5									0				Postnatally		0	0	0	0	0	0	0	0	0	0	0	1	0	0	1	1	0	1	0	Hetero	maternal
LMLN	chr3	Unreported	2									0						0	0	0	0	1	0	0	0	0	0	0	0	0	0	1	1	1	0	0	Hetero	Paternal
LOXHD1	chr18	Unreported	2	yes	no	no	no	no	no	no	no	1	1	hearing				0	0	0	0	0	0	0	0	0	1	0	0	0	0	1	1	0	1	0	Hetero	Paternal
LOXL2	chr8	Unreported	4.5									0			nerve conduction			0	0	0	0	0	0	0	0	0	1	0	0	0	0	1	1	0	1	0	Hetero	maternal
LPIN1	chr2	Unreported	6.5	no	no	no	no	no	no	no	no	0	0		myelin, schwann, axon			0	0	0	1	0	0	0	0	0	1	0	0	0	0	2	2	0	1	1	Hetero	Both
LRP1B	chr2	denovoDB	13.5	no	no	no	yes	no	no	no	yes	2	0					1	0	0	0	0	0	0	0	0	0	0	0	0	0	1	1	0	1	0	Hetero	Paternal
LRP2	chr2	SFARI score 3	8	yes	no	no	no	yes	no	no	no	2	1	hearing, visual	neuroithelium, NPC, dendrite, neuron, crania, axon, corpus callosum, brain development, brainstem, neural tube, brain morphology			0	0	0	1	0	0	0	2	0	0	0	0	1	0	4	3	0	4	0	Hetero	paternal (75)
LRP4	chr11	denovoDB	11	no	no	no	yes	no	no	no	yes	2	0		dendrite, neuron, neuromuscular, nerve conduction, axon, synapse	Postnatally	DEG+PPI	0	0	0	0	0	0	0	0	0	1	0	0	0	0	1	1	0	1	0	Hetero	maternal
LRRC28	chr15	Unreported	2.5									0						0	0	1	0	0	0	0	0	0	0	0	0	0	0	1	1	1	0	0	Hetero	Paternal
LRRC3C	chr17	Unreported	1.5									0						0	1	0	0	0	0	0	0	0	0	0	0	0	0	1	1	1	0	0	Hetero	Paternal
LRRC74A	chr14	Unreported	2.5									0						0	0	1	0	0	0	0	0	0	0	0	0	0	0	1	1	1	0	0	Hetero	Paternal
LRRFIP2	chr3	Unreported	5									0						0	0	1	0	0	0	0	0	0	0	0	0	0	0	1	1	1	0	0	Hetero	maternal
LRRN1	chr3	Unreported	3.5	yes	no	no	no	no	yes	no	no	2	1		microenchalopathy, corpus callosum	Prenatally		0	0	1	0	0	0	0	0	0	0	0	0	0	0	1	1	0	1	0	Hetero	maternal
LSG1	chr3	denovoDB	3.5	yes	no	no	no	no	no	no	no	1	1					0	0	0	0	0	0	0	0	0	0	0	0	1	0	1	1	0	1	0	Hetero	maternal
LTBP1	chr2	denovoDB	8	no	no	no	no	yes	no	no	yes	2	0		crania	Prenatally	DEG+PPI	0	0	0	0	0	0	1	0	0	0	0	0	0	0	1	1	0	1	0	Hetero	maternal
LTBP3	chr11	Unreported	7	no	no	no	no	no	yes	no	yes	2	0			Postnatally		0	0	0	0	0	0	0	0	0	0	0	0	1	0	1	1	0	1	0	Hetero	Paternal
LTK	chr15	denovoDB	4									0			neuron			0	1	0	0	0	0	0	0	0	0	0	0	0	0	1	1	1	0	0	Hetero	maternal
LUC7L3	chr17	Unreported	7									0				Prenatally		0	0	0	0	0	0	1	0	0	0	0	0	0	0	1	1	1	0	0	Hetero	Paternal
LYPD2	chr8	Unreported	2.5									0						0	0	0	0	0	0	1	0	0	0	0	0	0	0	1	1	0	1	0	Hetero	maternal
MADD	chr11	denovoDB	8	no	no	no	no	no	no	yes	yes	2	0	touch	neuron, synapse	Postnatally	DEG+PPI	0	0	1	0	0	0	0	0	0	0	0	0	0	0	1	1	0	1	0	Hetero	maternal
MAN1C1	chr1	Unreported	3	no	no	no	no	no	no	no	yes	1	0					0	0	0	0	0	1	0	0	0	0	0	0	0	0	1	1	1	0	0	Hetero	maternal
MAP3K4	chr6	Unreported	6.5	no	no	no	no	yes	no	no	no	1	0		neural tube, crania			0	0	0	0	0	0	0	0	0	1	0	0	0	0	1	1	1	0	0	Hetero	Paternal
MAP3K9	chr14	Unreported	7	no	no	no	no	no	no	no	yes	1	0					0	0	0	0	0	0	0	1	0	0	0	0	0	0	1	1	0	1	0	Hetero	maternal
MAPKAPK3	chr3	Unreported	2	no	no	no	no	no	no	no	no	0	0	pain	NGF	Postnatally	DEG+PPI	0	0	0	0	0	0	0	0	0	0	0	1	0	0	1	1	1	0	0	Hetero	maternal
MASP2	chr1	Unreported	3.5	no	no	no	no	no	no	no	yes	1	0					0	1	0	1	0	0	0	0	0	0	0	0	0	0	2	2	1	1	0	Hetero	Both
MASTL	chr10	denovoDB	4	no	no	no	no	no	no	no	yes	1	0		neurodevelopmental			1	0	0	0	0	0	0	0	0	0	0	0	0	0	1	1	0	1	0	Hetero	maternal
MATN2	chr8	Unreported	1.5									0						0	0	0	0	0	0	0	0	0	0	0	0	1	0	1	1	0	1	0	Hetero	maternal
MCF2L	chr13	Unreported	4	yes	no	no	no	no	no	no	yes	2	1					0	0	0	0	1	0	0	0	0	0	0	0	0	0	1	1	0	1	0	Hetero	maternal
MCM10	chr10	Unreported	3.5									0			microenchalopathy, corpus callosum	Prenatally	DEG+PPI	0	0	0	0	0	1	0	0	0	0	0	0	0	0	1	1	0	1	0	Hetero	maternal
MCM5	chr22	Unreported	6.5									0				Prenatally	DEG+PPI	0	0	0	0	1	0	0	0	0	0	0	0	0	0	1	1	0	1	0	Hetero	Paternal
MCM6	chr2	SFARI score 3	9									0			neurodevelopmental	Prenatally	DEG+PPI	0	0	0	0	0	0	0	0	0	0	1	0	0	0	1	1	0	1	0	Hetero	maternal
MDN1	chr6	denovoDB	4	yes	no	no	no	no	no	no	no	1	1		neurodevelopmental, microenchalopathy corpus callosum,			0	0	0	0	0	1	0	1	0	0	0	0	0	0	2	2	0	2	0	Hetero	Paternal
MED17	chr11	Unreported	8.5	no	no	no	no	yes	no	no	yes	2	0		microcephaly			0	0	0	0	0	0	0	1	0	0	0	0	0	0	1	1	1	0	0	Hetero	maternal
METTL25	chr12	Unreported	3.5	no	no	no	no	no	no	no	yes	1	0					0	0	0	0	0	0	0	0	0	1	0	0	0	0	1	1	0	1	0	Hetero	Paternal
MGAT5B	chr17	denovoDB	3	no	no	no	no	no	no	no	yes	1	0		myelin, astrocyte, oligodendrocyte	Postnatally	DEG+PPI	0	0	0	0	0	0	0	0	0	0	0	0	0	1	1	1	1	0	0	Hetero	Paternal
MICAL1	chr6	Unreported	3									0				Prenatally	DEG+PPI	0	0	0	1	0	0	0	0	0	0	0	0	0	0	1	1	0	1	0	Hetero	maternal
MICAL2	chr11	denovoDB	2	no	no	no	no	no	yes	no	yes	2	0		neuronal migration	Postnatally		0	1	0	1	0	0	0	0	0	0	0	0	0	0	2	2	0	2	0	Hetero	Both
MPL	chr1	Unreported	5	no	no	no	no	no	no	no	yes	1	0	pain	cerebral			0	0	0	0	0	0	0	0	0	0	1	0	0	0	1	1	1	0	0	Hetero	maternal
MPP4	chr2	Unreported	2	no	no	no	no	no	no	no	no	0	0		synapse			0	0	0	0	0	0	0	0	0	0	1	0	0	0	1	1	0	1	0	Hetero	maternal
MROH2A	chr2	Unreported	3.5	no	no	no	no	no	yes	no	no	1	0					0	0	0	0	0	0	0	0	1	0	0	0	0	0	1	1	1	0	0	Hetero	Paternal
MRPL24	chr1	Unreported	5	no	no	no	no	yes	no	no	yes	2	0					0	0	0	0	0	0	0	0	1	0	0	0	0	0	1	1	0	1	0	Hetero	Paternal
MRPS27	chr5	Unreported	4	no	no	no	no	no	no	no	yes	1	0					0	1	0	0	0	0	0	0	0	0	0	0	0	0	1	1	1	0	0	Hetero	maternal
MSH6	chr2	denovoDB	9	no	no	no	no	yes	no	no	yes	2	0	pain	astrocyte, crania	Prenatally	DEG+PPI	0	0	0	0	0	0	0	0	0	1	0	0	0	0	1	1	0	0	1	Hetero	Paternal
MST1	chr3	Unreported	3.5									0						0	0	1	0	0	0	0	0	0	0	0	0	0	0	1	1	1	0	0	Hetero	maternal
MTMR9	chr8	denovoDB	4.5									0						1	0	0	0	0	0	0	0	0	0	1	0	0	0	2	2	0	2	0	Hetero	Both
MTRF1	chr13	Unreported	1.5	no	no	no	no	no	no	no	no	0	0	visual				0	0	0	0	0	0	1	0	0	0	0	0	0	0	1	1	0	0	1	Hetero	Paternal
MUS81	chr11	Unreported	3.5	no	no	no	no	no	no	no	yes	1	0					0	0	0	0	0	0	0	0	1	0	0	0	0	0	1	1	1	0	0	Hetero	Paternal
MYH14	chr19	denovoDB	6	no	no	no	no	no	no	no	no	0	0	hearing	neuron	Postnatally	DEG+PPI	0	0	0	0	0	0	0	0	1	0	0	0	0	0	1	1	0	1	0	Hetero	maternal
MYH3	chr17	denovoDB	4.5	no	no	no	yes	no	no	no	no	1	0		cerebellum			0	0	0	0	1	0	0	0	0	0	0	0	0	0	1	1	0	1	0	Hetero	Paternal
MYLIP	chr6	Unreported	4.5	no	no	no	no	no	no	yes	yes	2	0		neuron	Postnatally		0	0	0	0	0	0	0	0	0	0	0	0	1	0	1	1	0	1	0	Hetero	Paternal
MYO18A	chr17	Unreported	8.5	no	no	no	no	no	no	no	yes	1	0					0	0	0	1	0	0	0	0	0	0	0	0	0	0	1	1	0	1	0	Hetero	Paternal
MYO18B	chr22	denovoDB	4.5	no	no	no	no	no	yes	no	yes	2	0					0	0	0	0	1	0	0	0	0	0	0	0	0	0	1	1	0	1	0	Hetero	Paternal
MYO3A	chr10	Unreported	2.5	no	no	no	no	no	no	yes	no	1	0	hearing				0	0	0	0	0	0	0	0	1	0	0	0	0	0	1	1	0	1	0	Hetero	maternal
MYO7A	chr11	Unreported	11.5	no	no	yes	no	yes	yes	yes	no	4	1	hearing, visual	cerebral, neuron, neuromuscular, brainstem			0	0	0	0	0	0	1	0	0	0	0	0	0	0	1	1	0	1	0	Hetero	maternal
MYO7B	chr2	denovoDB	3.5	no	no	no	no	no	no	no	no	0	0	hearing				0	0	0	0	0	0	0	0	0	0	0	0	1	0	1	1	0	1	0	Hetero	Paternal
MYO9A	chr15	denovoDB	8.5	yes	no	no	no	yes	no	no	yes	3	1	visual	cerebral, neuron, ganglion, axon			0	0	0	0	0	0	0	0	0	0	0	0	1	0	1	1	0	1	0	Hetero	Paternal
MYOD1	chr11	Unreported	5									0			cerebellum			0	1	0	0	0	0	0	0	0	0	0	0	0	0	1	1	0	1	0	Hetero	Paternal
MZF1	chr19	Unreported	3.5									0						0	0	0	0	0	0	0	0	0	0	0	0	0	1	1	1	0	1	0	Hetero	Paternal
NALCN	chr13	Unreported	6.5	no	yes	no	yes	yes	yes	no	yes	5	1		brain wave pattern, neuron,	Postnatally		0	0	0	0	0	1	0	0	1	0	0	0	0	0	2	2	0	2	0	Hetero	Both
NBAS	chr2	Unreported	3.5	yes	yes	no	no	yes	yes	no	yes	5	2					0	0	0	0	1	0	0	0	0	0	0	0	0	0	1	1	0	1	0	Hetero	Paternal
NBEAL1	chr2	Unreported	2.5									0						0	0	0	0	0	0	0	0	0	0	0	1	0	0	1	1	0	1	0	Hetero	Paternal
NDUFB7	chr19	Unreported	3.5	yes	no	no	no	no	no	no	yes	2	1		cerebellar atrophy, osteopenia, ophthalmic anomalies, neurodevelopmental delay	Postnatally		0	0	0	0	0	0	0	0	0	0	0	0	0	1	1	1	0	1	0	Hetero	Paternal
NDUFS3	chr11	Unreported	4.5	no	no	no	no	yes	yes	no	no	2	0		nigra, myelin, cerebral, cerebellum, macrochaly			0	0	0	0	0	1	0	0	0	0	0	0	0	0	1	1	0	1	0	Hetero	Paternal
NEB	chr2	denovoDB	7	no	no	no	no	yes	yes	yes	yes	4	0					0	0	0	0	1	1	0	0	0	0	0	0	0	0	2	2	0	2	0	Hetero	Both
NFATC2	chr20	Unreported	6.5	no	no	no	no	yes	no	no	yes	2	0		axon, neuron			0	0	0	0	1	0	0	0	0	0	0	0	0	0	1	1	0	1	0	Hetero	maternal
NFATC4	chr14	denovoDB	2.5	no	no	no	no	yes	no	no	no	1	0		BDNF, axon, neuron, synapse			0	0	0	0	0	0	0	0	1	0	0	0	0	0	1	1	0	1	0	Hetero	Paternal
NFE2L1	chr17	Unreported	6.5	no	no	no	no	no	no	no	yes	1	0		neuronal migration			0	0	0	0	0	0	0	0	0	0	0	1	0	0	1	1	0	1	0	Hetero	Paternal
NFE2L3	chr7	SFARI score 2	1	no	no	no	no	no	no	no	yes	1	0					0	1	0	0	0	0	0	0	0	0	0	0	0	0	1	1	1	0	0	Hetero	maternal
NGB	chr14	Unreported	1.5	no	no	no	no	no	no	no	yes	1	0			Postnatally	DEG+PPI	0	0	0	0	0	1	0	0	0	0	0	0	0	0	1	1	0	1	0	Hetero	Paternal
NIM1K	chr5	Unreported	2									0						0	0	0	1	0	0	0	0	0	0	0	0	0	0	1	1	1	0	0	Hetero	maternal
NLRP12	chr19	denovoDB	4.5	no	no	no	no	no	no	no	no	0	0	pain				0	0	0	0	1	0	0	0	0	0	0	0	0	0	1	1	0	1	0	Hetero	maternal
NMBR	chr6	Unreported	1.5	no	no	no	no	no	no	no	yes	1	0		neuron			0	0	1	0	0	0	0	0	0	0	0	0	0	0	1	1	0	1	0	Hetero	Paternal
NMRK1	chr9	Unreported	1.5									0						0	0	1	0	0	0	0	0	0	0	0	0	0	0	1	1	0	1	0	Hetero	Paternal
NOL11	chr17	Unreported	4	no	no	no	no	no	no	no	yes	1	0		neurodevelopmental	Prenatally		0	0	0	0	0	0	1	0	0	0	0	0	0	0	1	1	0	1	0	Hetero	Paternal
NOP16	chr5	Unreported	4									0						0	0	0	0	0	0	0	1	0	0	0	0	0	0	1	1	1	0	0	Hetero	Paternal
NOTCH3	chr19	denovoDB	7.5	no	no	no	no	yes	no	no	no	1	0	hearing	neural crest, cerebral, brainstem, axon, brain morphology			0	0	0	0	0	0	0	0	0	0	0	0	0	1	1	1	0	1	0	Hetero	maternal
NPLOC4	chr17	Unreported	3.5	no	no	no	no	no	no	no	yes	1	0					0	0	0	0	0	1	0	0	0	0	0	0	0	0	1	1	0	1	0	Hetero	Paternal
NPR1	chr1	Unreported	6									0			neuron			0	0	0	0	0	0	0	0	0	0	1	0	0	0	1	1	0	1	0	Hetero	Paternal
NPTX2	chr7	Unreported	1.5	yes	no	no	no	yes	no	no	no	2	1		neurotransmitter, neuron, synapse	Postnatally		0	0	0	0	0	0	0	0	0	0	0	0	1	0	1	1	0	1	0	Hetero	maternal
NQO1	chr16	Unreported	3									0			neuron, synapse	Postnatally	DEG+PPI	0	0	0	0	0	0	0	0	0	0	1	0	0	0	1	1	0	1	0	Hetero	maternal
NR2C1	chr12	Unreported	8									0						0	0	0	0	0	1	0	0	0	0	0	0	0	0	1	1	0	1	0	Hetero	Paternal
NR6A1	chr9	Unreported	8	no	no	no	no	no	no	no	no	0	0		crania, neuropore closure, brain development, neural tube			0	0	0	0	0	0	0	0	0	0	1	0	0	0	1	1	0	1	0	Hetero	Paternal
NRP1	chr10	denovoDB	6	yes	no	no	no	no	no	no	yes	2	1		neural crest, hippocampus, dendrite, neuron, ganglion, crania, corpus callosum, axon, brain morphology	Prenatally	DEG+PPI	0	0	0	0	0	0	0	0	0	1	0	0	0	0	1	1	0	1	0	Hetero	maternal
NRP2	chr2	SFARI score 3	12	yes	no	no	no	no	no	no	yes	2	1		axon, neuron, ganglion	Prenatally	DEG+PPI	0	0	0	0	0	0	0	0	0	0	1	0	1	0	2	2	0	2	0	Hetero	maternal
NT5C1A	chr1	Unreported	3	no	no	no	no	yes	no	no	no	1	0		myelin			0	0	0	0	0	0	0	0	0	0	0	0	1	0	1	1	0	1	0	Hetero	Paternal
NTN3	chr16	Unreported	3.5	no	no	no	no	no	no	no	no	0	0		axon			0	0	0	0	0	0	1	0	0	0	0	0	0	0	1	1	0	1	0	Hetero	Paternal
NUCB1	chr19	Unreported	3	no	no	no	no	no	no	no	yes	1	0		neuronal migration			1	0	0	0	0	0	0	0	0	0	0	0	0	0	1	1	0	1	0	Hetero	maternal
NUDT13	chr10	Unreported	1.5									0						0	0	0	1	0	0	0	0	0	0	0	0	0	0	1	1	0	0	1	Hetero	Paternal
NUDT5	chr10	Unreported	4									0						0	0	1	0	0	0	0	0	0	0	0	0	0	0	1	1	1	0	0	Hetero	maternal
NUMB	chr14	denovoDB	7	no	no	no	no	no	no	no	yes	1	0		brain development, neuron, neural tube, brain morphology			0	0	0	0	0	0	0	0	0	0	0	0	1	0	1	1	0	1	0	Hetero	Paternal
NUP155	chr5	SFARI score 1	9	no	no	no	yes	no	no	no	yes	2	0		microenchalopathy corpus callosum,			1	0	0	0	0	0	0	0	0	0	0	0	0	0	1	1	0	1	0	Hetero	Paternal
NUP43	chr6	Unreported	6									0						0	0	0	0	0	0	0	0	0	0	0	0	0	1	1	1	0	0	1	Hetero	Paternal
OBSL1	chr2	denovoDB	3	no	no	no	yes	no	no	no	yes	2	0		dendrite, neuron, nerve conduction, synapse			0	0	0	0	0	0	1	0	0	0	0	0	0	0	1	1	0	1	0	Hetero	Paternal
OCA2	chr15	Unreported	4.5	yes	yes	no	no	yes	no	no	no	3	2		cerebral	Prenatally		0	0	0	0	0	0	1	0	0	0	0	0	0	0	1	1	0	1	0	Hetero	Paternal
OGDHL	chr10	Unreported	5	no	no	no	no	no	no	no	yes	1	0			Postnatally		0	0	0	0	0	0	0	0	0	1	0	0	0	0	1	1	0	1	0	Hetero	Paternal
OGFOD2	chr12	Unreported	2	no	no	no	no	no	no	no	yes	1	0					0	0	0	0	0	0	0	0	0	0	0	1	0	0	1	1	1	0	0	Hetero	Paternal
OTOS	chr2	Unreported	3.5	no	no	no	no	no	no	no	yes	1	0	hearing				0	0	0	0	0	1	0	0	0	0	0	0	0	0	1	1	1	0	0	Hetero	Paternal
OVOL2	chr20	Unreported	3.5									0			neuroithelium, neuropore closure, brain development, neural tube, neural fold			0	0	0	0	0	0	0	0	1	0	0	0	0	0	1	1	0	1	0	Hetero	maternal
PAG1	chr8	Unreported	3	yes	no	no	no	no	no	no	no	1	1			Prenatally	DEG+PPI	0	0	0	0	0	0	0	0	0	0	0	0	1	0	1	1	0	1	0	Hetero	Paternal
PARP1	chr1	Unreported	9.5	no	yes	no	no	no	no	no	no	1	1		dopaminergic neuron, microenchalopathy corpus callosum, glia, neuron			0	0	0	0	0	0	0	1	0	0	0	0	0	0	1	1	1	0	0	Hetero	maternal
PAX5	chr9	SFARI score 1	9.5	no	no	no	no	yes	no	yes	yes	3	0		brain development, cerebellum			0	0	0	0	0	0	1	0	0	0	0	0	0	0	1	1	0	1	0	Hetero	Paternal
PCCA	chr13	SFARI & denovoDB	6.5	no	no	no	no	yes	no	no	no	1	0					0	0	0	0	0	0	0	0	0	1	0	0	0	0	1	1	0	1	0	Hetero	Paternal
PCCB	chr3	SFARI score 1	2.5	no	no	no	no	yes	no	no	yes	2	0					0	0	0	0	0	0	0	0	0	0	0	0	0	1	1	1	0	1	0	Hetero	Paternal
PCDH17	chr13	denovoDB	9.5	no	no	no	yes	yes	no	no	no	2	0	response, learning	paired-pulse, synapse, microenchalopathy corpus callosum,	Prenatally		0	0	0	0	1	0	0	0	0	0	0	0	0	0	1	1	0	1	0	Hetero	Paternal
PCDHA12	chr5	SFARI score 3	1.5									0				Prenatally	DEG+PPI	0	0	0	0	0	0	0	0	1	0	0	0	0	0	1	1	1	0	0	Hetero	Paternal
PCDHA2	chr5	SFARI score 3	1									0			neuron	Prenatally		0	0	0	0	0	0	0	0	1	0	0	0	0	0	1	1	1	0	0	Hetero	Paternal
PCTP	chr17	denovoDB	3.5									0						0	0	0	0	0	0	0	0	0	0	0	0	0	1	1	1	0	1	0	Hetero	maternal
PDCD4	chr10	Unreported	5									0						0	0	0	0	0	0	0	0	0	1	0	0	0	0	1	1	0	1	0	Hetero	Paternal
PDCL2	chr4	Unreported	5.5									0						0	0	0	0	0	0	0	0	0	1	0	0	0	0	1	1	0	1	0	Hetero	Paternal
PDE11A	chr2	denovoDB	4	no	yes	no	no	no	yes	yes	yes	4	1		neuron,			0	0	0	0	0	0	0	0	0	1	0	0	0	0	1	1	0	1	0	Hetero	maternal
PDE6C	chr10	denovoDB	4	yes	no	no	no	no	no	no	no	1	1	visual	neuron			0	0	0	0	0	0	0	0	0	0	0	1	0	0	1	1	0	1	0	Hetero	Paternal
PDGFRA	chr4	Unreported	8.5	no	no	no	yes	no	no	no	yes	2	0		myelin, astrocyte, oligodendrocyte, neuropore closure, neuronal migration, neural tube,	Postnatally	DEG+PPI	0	0	0	0	0	0	0	0	0	0	0	1	0	0	1	1	0	1	0	Hetero	maternal
PDHB	chr3	Unreported	4	no	no	no	no	no	no	no	no	0	0	hearing	brain development, microenchalopathy corpus callosum, neural tube			0	0	0	0	1	0	0	0	0	0	0	0	0	0	1	1	0	1	0	Hetero	Paternal
PDLIM5	chr4	Unreported	6	no	no	no	no	no	yes	yes	yes	3	0		dendrite, neuron, synapse	Postnatally		0	0	0	0	0	0	0	0	0	1	0	0	0	0	1	1	0	1	0	Hetero	Paternal
PDLIM7	chr5	Unreported	6.5									0			axon			0	0	1	0	0	0	0	0	0	0	0	0	0	0	1	1	0	1	0	Hetero	maternal
PDYN	chr20	Unreported	1.5	no	no	no	no	yes	yes	yes	yes	4	0	pain, vibratory	myelin, dendrite, neuron, cerebellum, synapse	Postnatally		1	0	0	0	0	0	0	0	0	0	0	0	0	0	1	1	0	1	0	Hetero	Paternal
PDZD8	chr10	denovoDB	6	no	no	no	no	no	no	yes	yes	2	0					0	0	1	0	0	0	0	0	0	0	0	0	0	0	1	1	0	1	0	Hetero	Paternal
PENK	chr8	Unreported	1.5	no	no	no	no	yes	yes	yes	yes	4	0	sensory perception	dendrite, neuron, synapse,			0	0	0	0	0	0	0	0	0	0	1	0	0	0	1	1	1	0	0	Hetero	Paternal
PFAS	chr17	denovoDB	6	no	no	no	no	no	no	no	yes	1	0		neurodevelopmental, crania			0	0	0	0	0	0	1	0	0	0	0	0	0	0	1	1	0	1	0	Hetero	Paternal
PFN4	chr2	Unreported	1.5									0						0	0	0	0	1	0	0	0	0	0	0	0	0	0	1	1	0	1	0	Hetero	Paternal
PINX1	chr8	Unreported	1.5									0						0	0	0	0	1	0	0	0	0	0	0	0	0	0	1	1	0	1	0	Hetero	Paternal
PITX3	chr10	Unreported	4	yes	no	no	no	yes	yes	yes	yes	5	1	pain	nigra, dopaminergic neuron, neuron, brain morphology			0	0	0	0	0	0	0	0	0	1	0	0	0	0	1	1	0	1	0	Hetero	maternal
PKHD1L1	chr8	denovoDB	2.5	no	no	no	no	no	no	yes	no	1	0					0	0	0	0	0	0	0	1	0	0	0	0	0	0	1	1	0	1	0	Hetero	Paternal
PLAA	chr9	denovoDB	7.5	no	no	no	no	no	no	no	yes	1	0		neurodevelopmental, dendrite, neuron, synapse			0	0	1	0	0	0	0	0	0	0	0	0	0	0	1	1	0	1	0	Hetero	maternal
PLCD4	chr2	SFARI score 3	3	no	no	no	no	no	yes	no	no	1	0					0	1	0	0	0	0	0	0	0	0	0	0	0	0	1	1	0	1	0	Hetero	maternal
PLEC	chr8	denovoDB	12	no	no	no	no	no	no	no	yes	1	0		neuromuscular, progressive postnatal microcephaly, axon, midline hand movements	Postnatally	DEG+PPI	0	0	0	0	0	0	0	1	0	0	0	0	0	0	1	1	0	1	0	Hetero	Paternal
PLEK	chr2	Unreported	5	no	no	no	no	no	yes	no	no	1	0					0	0	0	0	0	0	0	0	0	0	0	0	0	1	1	1	0	0	1	Hetero	Paternal
PLEKHG2	chr19	denovoDB	3.5									0				Prenatally	DEG+PPI	0	0	0	0	0	0	1	0	0	0	0	0	0	0	1	1	0	1	0	Hetero	maternal
PLIN2	chr9	Unreported	1.5	no	no	no	no	no	no	yes	no	1	0					0	0	0	1	0	0	0	0	0	0	0	0	0	0	1	1	0	1	0	Hetero	Paternal
PLOD2	chr3	denovoDB	2	no	no	no	no	no	no	no	yes	1	0			Postnatally		0	0	0	0	0	0	0	0	1	0	0	0	0	0	1	1	0	1	0	Hetero	Paternal
PMEL	chr12	Unreported	4	no	no	no	no	no	no	yes	no	1	0					0	0	0	0	0	0	0	0	1	0	0	0	0	0	1	1	0	0	1	Hetero	maternal
PNKD	chr2	Unreported	1.5	no	no	no	no	no	no	no	yes	1	0		neurotransmitter, synapse	Postnatally	DEG+PPI	0	0	0	0	0	0	0	0	0	1	0	0	0	0	1	1	0	1	0	Hetero	Paternal
PNPLA7	chr9	SFARI score 3	3.5	yes	no	no	no	no	no	no	yes	2	1					0	0	0	0	0	0	0	1	0	0	0	0	0	0	1	1	0	1	0	Hetero	maternal
PNPO	chr17	denovoDB	2	no	no	no	no	no	no	no	yes	1	0		microcephaly	Postnatally		0	0	0	0	0	0	0	0	0	1	0	0	0	0	1	1	0	1	0	Hetero	Paternal
POLD1	chr19	denovoDB	3	no	no	no	no	no	no	no	yes	1	0		neurodevelopmental	Prenatally	DEG+PPI	0	0	0	0	0	0	0	0	0	1	0	0	0	0	1	1	0	1	0	Hetero	maternal
POLE	chr12	denovoDB	7	no	yes	no	no	no	no	no	yes	2	1		microenchalopathy corpus callosum, macrochaly,			0	0	0	0	0	0	0	1	0	0	0	0	0	0	1	1	0	1	0	Hetero	maternal
POLE2	chr14	Unreported	3.5									0			brain development, neural tube			0	0	0	0	0	0	0	0	0	0	0	0	1	0	1	1	0	1	0	Hetero	maternal
POLL	chr10	Unreported	3	no	no	no	no	no	no	no	yes	1	0					0	0	0	0	0	0	0	1	0	0	0	0	0	0	1	1	1	0	0	Hetero	Paternal
POMGNT2	chr3	Unreported	3.5	no	no	no	no	yes	no	no	yes	2	0		cerebellum, cerebral cortex, neuron			0	0	0	0	0	0	0	0	0	0	0	0	1	0	1	1	0	1	0	Hetero	Paternal
POPDC3	chr6	Unreported	2.5									0				Postnatally		0	0	1	0	0	0	0	0	0	0	0	0	0	0	1	1	0	1	0	Hetero	Paternal
PPARGC1B	chr5	denovoDB	2	no	no	no	no	no	yes	yes	no	2	0	thermal				0	0	0	0	0	0	0	0	0	0	0	0	1	0	1	1	0	1	0	Hetero	maternal
PPAT	chr4	Unreported	5.5	no	no	no	yes	no	no	no	yes	2	0					0	0	0	0	0	0	1	0	0	0	0	0	0	0	1	1	0	1	0	Hetero	Paternal
PPP1R12B	chr1	Unreported	4									0			neurodevelopmental			0	0	0	0	0	0	0	0	0	0	1	0	0	0	1	1	0	1	0	Hetero	maternal
PPP2R1B	chr11	SFARI score 3	3									0			dopaminergic synapse			1	0	0	0	0	0	0	0	0	0	0	0	0	0	1	1	1	0	0	Hetero	Paternal
PRCP	chr11	denovoDB	4									0						0	0	0	0	0	0	0	0	0	1	0	0	0	0	1	1	0	1	0	Hetero	maternal
PRDX3	chr10	Unreported	1.5	no	no	no	no	no	no	no	yes	1	0					0	0	0	0	0	0	0	0	0	0	0	0	1	0	1	1	0	1	0	Hetero	Paternal
PREX2	chr8	Unreported	4.5	no	no	no	yes	no	no	yes	no	2	0		purkinje	Postnatally		0	0	0	0	0	1	0	0	0	0	0	0	0	0	1	1	0	1	0	Hetero	maternal
PRF1	chr10	Unreported	4	yes	no	no	yes	yes	yes	yes	yes	6	1		CNS, myelin, crania, synapse			0	1	0	0	0	0	0	0	0	0	0	0	0	0	1	1	0	1	0	Hetero	maternal
PRKAG1	chr12	Unreported	3.5	no	no	no	no	no	no	no	yes	1	0		synapse			0	0	0	0	0	0	1	0	0	0	0	0	0	0	1	1	0	1	0	Hetero	Paternal
PRLH	chr2	denovoDB	2.5									0			neuron			0	0	0	0	0	0	0	0	0	1	0	0	0	0	1	1	1	0	0	Hetero	maternal
PRORP	chr14	Unreported	2.5									0						0	0	0	0	1	0	0	0	0	0	0	0	0	0	1	1	1	0	0	Hetero	Paternal
PRSS12	chr4	Unreported	1	no	yes	no	no	no	no	yes	no	2	1		dendrite, axon, neuron,			0	0	1	0	0	0	0	0	1	0	0	0	0	0	2		1	1	0	Hetero	Both
PSEN2	chr1	Unreported	9	no	yes	no	yes	yes	no	no	no	3	1		neuron, neuromuscular			1	0	0	0	0	0	0	0	0	0	1	0	0	0	2	2	1	1	0	Hetero	maternal
PSMA4	chr15	Unreported	7	no	no	no	no	no	no	no	yes	1	0		neurodevelopmental, cerebellum			0	0	0	0	0	0	0	0	0	0	0	0	0	1	1	1	0	1	0	Hetero	Paternal
PSMB4	chr1	denovoDB	5.5	no	no	no	no	no	no	no	yes	1	0		neuronal migration, cerebellum			0	0	0	0	0	0	0	0	0	1	0	0	0	0	1	1	0	1	0	Hetero	maternal
PTCH1	chr9	Unreported	16.5	no	no	no	no	yes	no	no	yes	2	0		neural plate, CNS, neuron, neuropore closure, crania, cerebellum, axon, brain development, neural tube, brain morphology			0	0	0	0	0	0	0	0	0	0	1	0	0	0	1	1	0	1	0	Hetero	maternal
PTK2B	chr8	denovoDB	8.5	no	no	no	no	no	yes	no	yes	2	0	pain	BDNF, dendrite, neurotransmitter, neuron, neuronal migration, synapse	Postnatally	DEG+PPI	0	0	1	0	0	0	0	0	0	0	0	0	0	0	1	1	0	1	0	Hetero	maternal
PYGM	chr11	Unreported	6									0				Postnatally		0	0	0	0	0	0	0	0	0	0	1	0	0	0	1	1	0	1	0	Hetero	Paternal
QPCTL	chr19	Unreported	3.5									0						0	0	1	0	0	0	0	0	0	0	0	0	0	0	1	1	1	0	0	Hetero	Paternal
QSER1	chr11	Unreported	4	yes	no	no	no	yes	no	no	no	2	1		neurodevelopmental, microenchalopathy corpus callosum,	Prenatally		1	0	0	0	0	0	0	0	0	0	0	0	0	0	1	1	0	1	0	Hetero	Paternal
RAB11FIP5	chr2	SFARI score 3	3	no	no	no	no	no	no	no	yes	1	0		progressive postnatal microcephaly, neuronal migration	Postnatally		0	0	1	0	0	0	0	0	0	0	0	0	0	0	1	1	0	1	0	Hetero	maternal
RAB38	chr11	Unreported	1.5	no	no	no	no	no	no	no	yes	1	0					0	1	0	0	0	0	0	0	0	0	0	0	0	0	1	1	0	1	0	Hetero	maternal
RAB5A	chr3	Unreported	3.5	no	no	no	no	no	yes	no	yes	2	0		dendrite, neurotransmitter, neuron, axon, synapse			0	0	0	0	0	0	0	0	0	0	0	0	1	0	1	1	0	1	0	Hetero	Paternal
RABGGTA	chr14	denovoDB	6.5	yes	no	no	no	no	no	no	no	1	1	visual				0	0	0	0	0	1	0	0	0	0	0	0	0	0	1	1	0	1	0	Hetero	maternal
RAD54B	chr8	Unreported	3.5	no	no	no	no	no	no	no	yes	1	0					0	0	0	0	0	0	1	0	0	0	0	0	0	0	1	1	0	1	0	Hetero	maternal
RAG1	chr11	Unreported	2.5									0			neuron			0	0	0	0	0	0	0	0	0	0	0	0	0	1	1	1	0	1	0	Hetero	maternal
RALGAPA2	chr20	Unreported	5.5									0				Prenatally	DEG+PPI	0	0	0	0	0	1	0	0	0	0	0	1	0	0	2	2	0	2	0	Hetero	Both
RASSF8	chr12	Unreported	3.5	yes	no	no	no	no	no	no	no	1	1		nerve conduction			0	0	0	0	0	0	0	0	0	0	0	1	0	0	1	1	0	1	0	Hetero	Paternal
RBL2	chr16	Unreported	9.5									0			neuron			0	0	0	0	0	0	0	0	0	0	1	0	0	0	1	1	0	1	0	Hetero	Paternal
RBM19	chr12	denovoDB	4	no	no	no	no	no	no	no	yes	1	0					0	0	0	0	0	0	0	0	0	0	0	1	0	0	1	1	0	1	0	Hetero	Paternal
RCC2	chr1	Unreported	7.5	no	no	no	no	no	no	no	yes	1	0		neurodevelopmental, microenchalopathy corpus callosum,			0	0	0	0	0	0	1	0	0	0	0	0	0	0	1	1	0	1	0	Hetero	maternal
RCVRN	chr17	Unreported	2.5									0						0	0	0	0	1	0	0	0	0	0	0	0	0	0	1	1	0	1	0	Hetero	Paternal
RDH14	chr2	Unreported	1.5	no	no	no	no	no	no	no	yes	1	0					1	0	0	0	0	0	0	0	0	0	0	0	0	0	1	1	0	1	0	Hetero	Paternal
RELB	chr19	Unreported	8	no	no	no	no	no	no	no	yes	1	0		dendrite			0	0	0	0	0	0	0	0	1	0	0	0	0	0	1	1	0	1	0	Hetero	maternal
RFWD3	chr16	denovoDB	5.5	no	no	no	no	yes	no	no	yes	2	0		neurodevelopmental, microenchalopathy corpus callosum			1	0	0	0	0	0	0	0	0	0	0	0	0	0	1	1	0	1	0	Hetero	maternal
RFX6	chr6	Unreported	4.5									0						0	0	1	0	0	0	0	0	0	0	0	0	0	0	1	1	0	1	0	Hetero	maternal
RGCC	chr13	Unreported	1.5									0						0	0	0	0	1	0	0	0	0	0	0	0	0	0	1	1	0	1	0	Hetero	maternal
RGMA	chr15	denovoDB	9									0			brain development, crania, axon, neuropore closure	Prenatally		0	0	0	0	0	0	0	0	0	0	0	0	1	0	1	1	0	1	0	Hetero	Paternal
RGP1	chr9	Unreported	3									0						0	0	0	0	1	0	0	0	0	0	0	0	0	0	1	1	1	0	0	Hetero	maternal
RHOT2	chr16	denovoDB	6.5	no	no	no	no	no	no	no	yes	1	0		neurodevelopmental, cerebellar atrophy, osteopenia, ophthalmic anomalies, neurodevelopmental delay			0	0	0	0	0	0	0	0	0	0	0	1	0	0	1	1	0	1	0	Hetero	Paternal
RIMS2	chr8	SFARI score 3	8	no	no	no	yes	yes	no	no	yes	3	0		cerebellar ataxia, psycho delay, dendrite, neurotransmitter, neuron, synapse,	Postnatally	DEG+PPI	0	0	0	0	1	0	0	0	0	0	0	0	0	0	1	1	0	1	0	Hetero	Paternal
RNF19A	chr8	Unreported	6.5	no	no	no	no	yes	no	yes	yes	3	0		hippocampus, neuron, long term potentiation, synapse			1	0	0	0	0	0	0	0	0	0	0	0	0	0	1	1	0	1	0	Hetero	Paternal
RNF4	chr4	Unreported	4	yes	no	no	no	no	no	no	no	1	1					0	0	0	0	0	0	0	1	0	0	0	0	0	0	1	1	0	1	0	Hetero	maternal
RNGTT	chr6	Unreported	9.5	no	no	no	yes	no	no	no	yes	2	0					0	0	0	0	0	0	0	0	0	1	0	0	0	0	1	1	0	1	0	Hetero	maternal
ROBO3	chr11	denovoDB	4	yes	no	no	no	yes	no	no	no	2	1		dendrite, axon, neuron, brain morphology			0	0	0	0	0	0	1	0	1	0	0	0	0	0	2	2	0	2	0	Hetero	Paternal
ROS1	chr6	denovoDB	4	no	no	no	no	yes	no	no	no	1	0					0	0	0	0	0	0	0	0	0	1	1	0	0	0	2	2	1	1	0	Hetero	maternal
RPAP3	chr12	Unreported	7.5	no	no	no	yes	no	no	no	no	1	0					0	0	0	0	0	0	0	0	0	0	0	0	1	0	1	1	0	1	0	Hetero	Paternal
RPL14	chr3	denovoDB	3.5									0			synapse			0	0	0	0	1	0	0	0	0	0	0	0	0	0	1	1	1	0	0	Hetero	Paternal
RPL28	chr19	Unreported	3.5									0			dendrite, neuron	Prenatally	DEG+PPI	0	0	0	0	0	0	0	1	0	0	0	0	0	0	1	1	1	0	0	Hetero	maternal
RPN2	chr20	Unreported	4.5	no	no	no	no	no	no	no	yes	1	0					0	0	0	0	0	0	0	1	0	0	0	0	0	0	1	1	1	0	0	Hetero	maternal
RPS23	chr5	Unreported	4.5	yes	no	no	no	no	no	no	no	1	1			Prenatally	DEG+PPI	0	0	0	0	0	0	0	0	0	0	0	0	1	0	1	1	0	0	1	Hetero	maternal
RPS6KB2	chr11	Unreported	4									0						0	0	0	1	0	0	0	0	0	0	0	0	0	0	1	1	1	0	0	Hetero	Paternal
RSPH6A	chr19	Unreported	5.5									0			axon			1	0	0	0	0	0	0	0	0	0	0	0	1	0	2	2	0	2	0	Hetero	Both
RTN4IP1	chr6	Unreported	5	no	no	no	no	no	no	no	yes	1	0		dendrite, neuron			0	0	0	0	0	0	0	0	0	0	1	0	0	0	1	1	0	1	0	Hetero	Paternal
RTTN	chr18	Unreported	3.5	no	no	no	yes	no	no	no	no	1	0		neural tube,			0	0	0	0	0	0	0	0	0	0	1	0	0	0	1	1	0	1	0	Hetero	maternal
RUNX1	chr21	Unreported	7.5	no	no	no	no	no	no	no	yes	1	0		neuron, PNS			0	0	0	0	0	0	0	0	0	0	0	0	1	0	1	1	0	1	0	Hetero	maternal
RYR3	chr15	denovoDB	12.5	yes	yes	no	yes	yes	yes	yes	yes	7	2		neuron, long term dression, long term potentiation			0	1	0	0	0	0	0	0	0	0	0	0	0	0	1	1	0	1	0	Hetero	maternal
SACS	chr13	denovoDB	9.5	yes	no	no	yes	no	no	no	yes	3	1	vibratory	myelin, dendrite, neuron, purkinje, microenchalopathy corpus callosum, axon,	Prenatally		0	0	0	0	0	0	0	0	1	0	0	0	0	0	1	1	0	1	0	Hetero	Paternal
SAE1	chr19	SFARI score 2	6.5	no	no	no	no	no	no	no	yes	1	0		neurodevelopmental			0	1	0	0	0	0	0	0	0	0	0	0	0	0	1	1	0	1	0	Hetero	Paternal
SAFB2	chr19	Unreported	5.5	no	no	no	no	no	no	yes	yes	2	0					0	0	0	0	0	0	0	0	0	0	0	1	0	0	1	1	0	1	0	Hetero	maternal
SAMD4A	chr14	Unreported	8.5	no	no	no	no	no	no	yes	yes	2	0			Postnatally		0	0	0	0	0	0	0	0	0	0	1	0	0	0	1	1	0	1	0	Hetero	Paternal
SCAPER	chr15	Unreported	2.5	no	yes	no	no	no	no	no	yes	2	1					0	0	0	0	0	0	0	0	0	0	0	1	0	0	1	1	0	1	0	Hetero	Paternal
SCN11A	chr3	denovoDB	5	no	no	no	yes	no	no	no	no	1	0	pain	synapse, axon, neuron,			0	0	0	0	0	0	0	0	0	0	0	0	1	0	1	1	0	1	0	Hetero	Paternal
SCN1B	chr19	Unreported	2.5	no	no	no	no	yes	no	no	yes	2	0		brain wave pattern, axon, neuron,	Postnatally		0	0	0	1	0	0	0	0	0	0	0	0	0	0	1	1	0	1	0	Hetero	maternal
SCN3A	chr2	denovoDB	15.5	yes	no	no	no	no	no	no	no	1	1		axon, neuron	Prenatally		0	0	0	1	0	0	0	0	0	0	0	0	0	0	1	1	0	1	0	Hetero	Paternal
SCN5A	chr3	denovoDB	11	no	no	no	no	no	no	no	yes	1	0		neuron			0	0	0	0	0	0	0	0	1	0	0	0	0	0	1	1	0	1	0	Hetero	Paternal
SDK1	chr7	denovoDB	5.5	yes	no	no	no	no	yes	no	yes	3	1		neuron, synapse	Prenatally		0	0	1	1	0	0	0	0	0	0	0	0	0	0	2	2	0	2	0	Hetero	Both
SEC23IP	chr10	Unreported	4	no	no	no	no	no	no	no	yes	1	0					0	0	0	0	0	0	0	0	0	0	1	0	0	0	1	1	0	1	0	Hetero	maternal
SELENBP1	chr1	Unreported	3.5									0			brain development	Postnatally		0	0	0	0	0	0	0	0	1	0	0	0	0	0	1	1	0	1	0	Hetero	maternal
SERPINB1	chr6	Unreported	2	no	no	no	no	no	no	no	yes	1	0			Postnatally		0	0	0	0	0	0	0	0	1	0	0	0	0	0	1	1	0	1	0	Hetero	maternal
SERPINE2	chr2	Unreported	3	no	no	no	no	no	no	no	yes	1	0	pain	schwann, PNS, astrocyte, neuromuscular, cerebellum, long term potentiation, synapse, glia	Postnatally		1	0	0	0	0	0	0	0	0	0	0	0	0	0	1	1	0	1	0	Hetero	Paternal
SETX	chr9	denovoDB	3	yes	no	no	yes	no	no	no	yes	3	1	vibratory	dendrite, neuron, cerebellum, axon			0	0	0	0	0	0	1	0	0	0	0	0	0	0	1	1	0	1	0	Hetero	maternal
SFMBT2	chr10	denovoDB	5.5	no	no	no	no	no	yes	no	yes	2	0					0	1	0	0	0	0	0	0	0	0	0	0	0	0	1	1	0	1	0	Hetero	maternal
SGCB	chr4	Unreported	1.5	no	no	no	no	no	no	no	yes	1	0					0	0	0	0	0	1	0	0	0	0	0	0	0	0	1	1	0	1	0	Hetero	maternal
SH3TC2	chr5	Unreported	4	yes	no	no	no	no	no	no	no	1	1	sensory	myelin, schwann, axon, neuron			0	1	0	0	0	0	0	0	0	0	0	0	0	0	1	1	1	0	0	Hetero	Paternal
SHISA3	chr4	Unreported	1.5	no	no	no	no	no	no	no	yes	1	0					0	0	0	1	0	0	0	0	0	0	0	0	0	0	1	1	0	0	1	Hetero	Paternal
SIGLEC1	chr20	denovoDB	6.5	no	no	no	no	no	no	no	yes	1	0					0	0	0	0	0	0	0	1	0	0	0	0	0	0	1	1	1	0	0	Hetero	maternal
SIX3	chr2	Unreported	7	no	no	no	no	yes	no	no	yes	2	0	visual	NPC, CNS, neuron, crania, cerebellum, microenchalopathy corpus callosum, brain development, neural tube, brain morphology	Prenatally	DEG+PPI	0	0	0	0	0	1	0	0	0	0	0	0	0	0	1	1	0	1	0	Hetero	maternal
SIX6	chr14	Unreported	4.5	no	no	no	no	yes	no	no	yes	2	0	visual				0	0	0	0	0	0	0	0	0	0	0	1	0	0	1	1	0	1	0	Hetero	maternal
SLC14A2	chr18	Unreported	3									0						0	0	0	0	0	0	0	0	0	1	0	0	0	0	1	1	0	1	0	Hetero	maternal
SLC15A2	chr3	Unreported	1.5									0				Postnatally		0	1	0	0	0	0	0	0	0	0	0	0	0	0	1	1	0	1	0	Hetero	Paternal
SLC18A3	chr10	Unreported	3.5	no	yes	no	no	yes	no	yes	yes	4	1		neurotransmitter, synapse, neuron			0	0	0	0	0	0	0	0	1	0	0	0	0	0	1	1	0	1	0	Hetero	maternal
SLC22A4	chr5	Unreported	3.5									0						0	0	0	0	1	0	0	0	0	0	0	0	0	0	1	1	0	1	0	Hetero	Paternal
SLC24A4	chr14	Unreported	1.5	no	no	no	no	no	no	no	no	0	0	olfactory, touch				0	0	0	0	0	0	1	0	0	0	0	0	0	0	1	1	0	1	0	Hetero	maternal
SLC26A1	chr4	denovoDB	5.5									0						1	0	0	0	0	0	0	0	0	0	0	0	0	0	1	1	0	1	0	Hetero	Paternal
SLC26A4	chr7	Unreported	3.5	no	no	yes	no	yes	yes	no	yes	4	1	hearing	brainstem			0	0	0	0	0	0	0	1	0	0	0	0	0	0	1	1	0	1	0	Hetero	Paternal
SLC26A7	chr8	denovoDB	6	no	no	no	no	no	no	no	yes	1	0					0	0	0	0	0	1	1	0	0	0	0	0	0	0	2	2	0	2	0	Hetero	Both
SLC34A1	chr5	denovoDB	3	no	no	no	no	no	no	no	no	0	0	hypersensitivity				0	0	0	0	1	0	0	0	0	0	0	0	0	0	1	1	0	1	0	Hetero	Paternal
SLC36A1	chr5	Unreported	3.5	no	no	yes	no	no	no	no	no	1	1			Postnatally		0	0	0	0	0	0	1	0	0	0	0	0	0	0	1	1	0	1	0	Hetero	Paternal
SLC37A1	chr21	Unreported	3	no	no	no	yes	no	no	no	yes	2	0			Prenatally		0	0	0	0	0	0	0	0	0	1	0	0	0	0	1	1	0	1	0	Hetero	Paternal
SLC43A1	chr11	Unreported	3.5									0						0	0	0	0	0	0	0	0	0	0	0	1	0	0	1	1	0	1	0	Hetero	Paternal
SLC44A2	chr19	Unreported	3	no	no	no	no	no	no	yes	no	1	0	hearing	brainstem	Postnatally		0	0	0	0	0	0	0	0	0	0	0	0	0	1	1	1	0	1	0	Hetero	maternal
SLC4A1	chr17	denovoDB	3.5	no	no	no	no	no	no	no	yes	1	0			Prenatally		0	0	0	0	0	0	1	0	0	0	0	0	0	0	1	1	0	1	0	Hetero	Paternal
SLC4A11	chr20	denovoDB	6.5	no	no	no	no	no	no	no	no	0	0	hearing				0	0	0	0	0	0	0	0	1	0	0	0	0	0	1	1	0	1	0	Hetero	Paternal
SLC4A3	chr2	Unreported	4.5	no	no	no	no	no	no	no	yes	1	0		astrocyte, progressive postnatal microcephaly	Postnatally		0	0	0	0	0	1	0	0	0	0	0	0	0	0	1	1	0	1	0	Hetero	Paternal
SLC4A9	chr5	denovoDB	2.5									0						1	0	0	0	0	0	0	0	0	0	0	0	0	0	1	1	0	1	0	Hetero	maternal
SLC5A12	chr11	Unreported	1.5	no	no	no	yes	no	no	no	no	1	0					0	0	0	0	0	0	0	0	0	0	0	0	1	0	1	1	0	1	0	Hetero	Paternal
SLC5A9	chr1	Unreported	2									0						1	0	0	0	0	0	0	0	0	0	0	0	0	0	1	1	0	1	0	Hetero	Paternal
SLC6A15	chr12	Unreported	3	yes	no	no	no	yes	yes	no	no	3	1		cerebellar ataxia, psycho delay, neurotransmitter, neuron	Prenatally		0	1	0	0	0	0	0	0	0	0	0	0	0	0	1	1	0	1	0	Hetero	Paternal
SLC7A2	chr8	Unreported	3	no	no	no	no	no	no	no	yes	1	0					0	0	0	0	0	1	0	0	0	0	0	0	0	1	2	2	0	2	0	Hetero	Paternal
SLC8A3	chr14	Unreported	6.5	no	no	no	no	no	no	yes	yes	2	0		CNS, myelin, dendrite, cerebral, neuron, neuromuscular, oligodendrocyte, axon, synapse, glia			0	0	0	0	1	0	0	0	0	0	0	0	0	0	1	1	0	1	0	Hetero	Paternal
SLCO2A1	chr3	Unreported	3.5									0			cerebral			0	0	0	0	0	0	0	0	0	0	0	0	0	1	1	1	0	1	0	Hetero	Paternal
SLCO4A1	chr20	denovoDB	6.5	no	no	no	no	no	no	no	yes	1	0			Postnatally		0	0	0	0	0	0	1	0	0	0	0	0	0	0	1	1	1	0	0	Hetero	maternal
SLITRK6	chr13	denovoDB	4	no	no	no	no	no	yes	yes	yes	3	0		neuroithelium, neuron, ganglion, brainstem, axon, synapse	Prenatally		0	0	1	0	0	0	0	0	0	0	0	0	0	0	1	1	0	1	0	Hetero	Paternal
SLK	chr10	denovoDB	6									0			brain development, ganglion, NPC, brain morphology			0	0	0	0	0	0	1	0	0	0	1	0	0	0	2	2	0	1	1	Hetero	Both
SMAD6	chr15	denovoDB	5.5									0						0	0	0	1	0	0	0	0	0	0	0	1	0	0	2	2	0	2	0	Hetero	Paternal
SMARCA4	chr19	SFARI score 1	14	yes	no	no	no	yes	no	no	yes	3	1		microcephaly	Prenatally	DEG+PPI	0	0	0	0	0	1	0	0	0	0	0	0	0	0	1	1	0	1	0	Hetero	Paternal
SMARCAL1	chr2	denovoDB	2	no	no	no	no	no	no	no	no	0	0		cerebral			0	0	0	0	0	0	1	0	0	0	0	0	0	0	1	1	0	1	0	Hetero	Paternal
SMC4	chr3	denovoDB	8.5	no	no	no	no	no	no	no	yes	1	0		microenchalopathy corpus callosum	Prenatally		0	1	0	0	0	0	0	0	0	0	0	0	0	0	1	1	0	1	0	Hetero	maternal
SMG1	chr16	Unreported	10.5	yes	no	no	yes	yes	no	no	yes	4	1		brain development	Prenatally		0	0	0	0	0	0	0	0	0	0	0	0	0	1	1	1	1	0	0	Hetero	Paternal
SMOX	chr20	Unreported	10	no	no	no	no	yes	no	no	yes	2	0			Postnatally		0	0	0	0	0	0	0	0	0	0	1	0	0	0	1	1	0	1	0	Hetero	Paternal
SNCAIP	chr5	denovoDB	3	no	no	no	yes	no	no	no	yes	2	0		synapse, neurotransmitter	Prenatally		0	0	0	0	0	0	0	0	0	0	0	1	0	0	1	1	1	0	0	Hetero	maternal
SNX25	chr4	Unreported	2									0						0	0	0	1	0	0	0	0	0	0	0	0	0	0	1	1	0	1	0	Hetero	maternal
SORL1	chr11	Unreported	5.5	yes	yes	no	yes	yes	yes	yes	yes	7	2		neuron	Postnatally	DEG+PPI	0	0	0	0	0	0	0	0	0	0	0	0	0	1	1	1	0	1	0	Hetero	Paternal
SOS1	chr2	Unreported	12	yes	no	no	no	no	no	no	no	1	1	pain	BDNF, NGF, dendrite, astrocyte, neuron, crania, axon, brain morphology			0	0	0	0	0	1	0	0	0	0	0	0	0	0	1	1	0	1	0	Hetero	Paternal
SPAST	chr2	SFARI score 1	8.5	yes	yes	no	no	yes	yes	no	yes	5	2	vibratory	axon, brain morphology	Prenatally	DEG+PPI	0	0	0	0	0	0	1	0	0	0	0	0	0	1	2	2	0	2	0	Hetero	Paternal
SPG11	chr15	denovoDB	3	no	no	no	no	yes	no	no	yes	2	0	vibratory	myelin, dendrite, cerebral, neuron, corpus callosum, axon, synapse			1	0	0	0	0	0	0	0	0	0	0	0	0	0	1	1	0	1	0	Hetero	maternal
SPG7	chr16	Unreported	5	no	no	no	no	yes	no	no	yes	2	0	vibratory,	cerebral, cerebellum, neuron, axon			0	0	0	0	0	1	0	0	0	0	0	0	0	0	1	1	0	1	0	Hetero	Paternal
SPRED1	chr15	Unreported	4.5	no	no	no	no	yes	yes	no	yes	3	0		paired-pulse, long term dression, long term potentiation, synapse			0	0	0	0	0	0	1	0	0	0	0	0	0	1	2	2	0	2	0	Hetero	Both
SPRY4	chr5	Unreported	5.5	no	no	no	no	no	no	no	yes	1	0			Postnatally	DEG+PPI	0	0	0	0	0	0	0	0	1	0	0	0	0	0	1	1	0	1	0	Hetero	Paternal
SPTB	chr14	denovoDB	7.5	yes	no	no	no	no	no	no	yes	2	1		axon, brain morphology	Postnatally	DEG+PPI	0	1	0	0	0	0	0	0	0	0	0	1	0	0	2	2	0	2	0	Hetero	maternal
SREBF1	chr17	Unreported	6.5	no	no	no	no	yes	no	no	yes	2	0			Postnatally	DEG+PPI	0	0	0	0	0	0	0	0	0	0	0	0	1	0	1	1	1	0	0	Hetero	maternal
SRGAP1	chr12	Unreported	7									0			axon	Prenatally		0	0	0	0	0	0	1	0	0	0	0	0	0	0	1	1	0	1	0	Hetero	Paternal
STAB2	chr12	denovoDB	6									0						0	0	0	0	0	0	0	0	0	1	0	0	0	0	1	1	0	1	0	Hetero	Paternal
STARD13	chr13	Unreported	4.5	no	no	no	yes	no	no	no	yes	2	0					0	0	1	0	0	0	0	0	0	0	0	0	0	0	1	1	0	1	0	Hetero	Paternal
STK31	chr7	denovoDB	4									0						0	0	0	0	0	0	0	0	0	0	0	2	0	0	2	1	2	0	0	Hetero	Paternal
STRIP1	chr1	denovoDB	8.5									0			neuronal migration			0	0	0	0	0	0	1	0	0	0	0	0	0	0	1	1	0	1	0	Hetero	Paternal
STT3A	chr11	denovoDB	9	no	no	no	no	yes	yes	yes	yes	4	0		cerebellum			0	0	0	0	1	0	0	0	0	0	0	0	0	0	1	1	0	1	0	Hetero	Paternal
STX16	chr20	Unreported	2.5	no	no	no	no	no	yes	yes	yes	3	0					0	0	0	0	0	0	0	1	0	0	0	0	0	1	2	2	2	0	0	Hetero	Paternal
STX6	chr1	Unreported	5	no	no	no	no	no	no	yes	no	1	0		synapse			0	0	0	1	0	0	0	0	0	0	0	0	0	0	1	1	0	1	0	Hetero	maternal
SULF1	chr8	Unreported	7									0			glia			0	0	0	0	0	0	0	0	0	1	0	0	0	0	1	1	0	1	0	Hetero	Paternal
SUPV3L1	chr10	Unreported	6.5									0			crania			0	0	0	0	0	0	0	1	0	0	0	0	0	0	1	1	0	1	0	Homo	Paternal
SVEP1	chr9	Unreported	1.5	no	no	no	no	no	no	no	yes	1	0					0	0	0	0	0	0	1	0	0	0	0	0	0	0	1	1	0	1	0	Hetero	maternal
SYF2	chr1	Unreported	4.5	no	no	no	no	no	no	no	yes	1	0					0	0	0	0	0	0	1	0	0	0	0	0	0	0	1	1	0	1	0	Hetero	Paternal
SYNE1	chr6	SFARI score 3	2	yes	no	yes	yes	no	yes	no	yes	5	2		neuron, synapse,	Postnatally		0	0	0	0	0	0	0	0	0	0	0	1	0	0	1	1	0	1	0	Hetero	maternal
SYNJ1	chr21	SFARI score 3	6	no	no	no	no	yes	no	no	yes	2	0		brain development, neurotransmitter, synapse, CNS	Postnatally		0	0	0	0	0	0	0	0	0	0	0	0	0	1	1	1	0	1	0	Hetero	maternal
SYNJ2	chr6	denovoDB	5	no	no	no	no	yes	no	no	no	1	0	hearing	brain development, brainstem, synapse, CNS	Postnatally		0	0	1	0	0	0	0	0	0	0	1	0	0	0	2	2	0	2	0	Hetero	Both
SYPL2	chr1	Unreported	5	no	no	no	no	yes	no	no	no	1	0		nigra, synapse			0	0	0	0	0	0	0	1	0	0	0	0	0	0	1	1	0	1	0	Hetero	Paternal
SYTL2	chr11	Unreported	2.5									0			neuron	Postnatally		0	0	0	0	0	0	0	0	0	1	1	0	0	0	2	2	0	2	0	Hetero	maternal
SZT2	chr1	denovoDB	4.5	no	no	no	no	yes	no	no	yes	2	0	kindling response	CNS, neuron			0	1	0	0	0	0	0	0	0	0	0	0	1	0	2	2	0	1	1	Hetero	Both
TAS1R3	chr1	Unreported	5.5	no	no	no	no	no	no	no	no	0	0	taste	neuron			0	0	0	0	1	0	0	0	0	0	0	0	0	0	1	1	0	1	0	Hetero	maternal
TATDN1	chr8	Unreported	3	no	no	no	no	no	no	no	yes	1	0					0	0	0	0	0	0	1	0	0	0	0	0	0	0	1	1	0	0	1	Hetero	Paternal
TBC1D8	chr2	Unreported	6.5	no	no	no	no	yes	no	yes	no	2	0	hearing				0	0	0	0	0	0	0	1	0	0	0	0	0	0	1	1	1	0	0	Hetero	maternal
TBK1	chr12	denovoDB	7	no	yes	no	yes	no	no	no	no	2	1		neuron			0	0	0	0	0	1	0	0	0	0	0	0	0	0	1	1	0	1	0	Hetero	maternal
TBRG1	chr11	Unreported	2									0				Postnatally		0	0	0	0	1	0	0	0	0	0	0	0	0	0	1	1	0	1	0	Hetero	Paternal
TBX19	chr1	Unreported	3.5									0						0	0	0	0	0	0	0	0	0	0	0	0	0	1	1	1	0	1	0	Hetero	Paternal
TCTN2	chr12	denovoDB	2	no	no	no	yes	yes	no	no	no	2	0		neuroithelium, neural tube			0	0	0	0	0	0	0	0	0	1	0	0	0	0	1	1	0	1	0	Hetero	maternal
TECPR2	chr14	Unreported	4.5	no	no	no	no	yes	no	yes	no	2	0	pain	neurodevelopmental, axon, corpus callosum			0	0	0	0	0	0	0	0	0	0	0	0	1	0	1	1	0	1	0	Hetero	maternal
TENM3	chr4	Unreported	11.5	yes	no	no	yes	no	no	no	yes	3	1	pain	neuron, nerve conduction, microenchalopathy corpus callosum,			0	0	0	0	0	0	0	0	0	0	1	0	0	0	1	1	0	1	0	Hetero	maternal
TES	chr7	Unreported	7	no	no	no	no	no	no	no	yes	1	0					0	0	0	1	0	0	0	0	0	0	0	0	0	0	1	1	0	1	0	Hetero	maternal
TGFBI	chr5	Unreported	7	no	no	no	no	no	no	no	yes	1	0	visual		Postnatally		1	0	0	0	0	0	0	0	0	0	0	0	0	0	1	1	0	1	0	Hetero	maternal
THBS3	chr1	denovoDB	5									0						0	0	0	0	0	0	0	0	0	0	0	0	1	0	1	1	0	0	1	Hetero	maternal
TIMM44	chr19	denovoDB	4									0						0	0	0	0	0	0	0	0	0	0	0	0	0	1	1	1	0	1	0	Hetero	maternal
TM9SF4	chr20	SFARI score 1	7									0			neuronal migration			0	0	0	0	0	0	0	0	0	0	0	1	0	0	1	1	0	1	0	Hetero	maternal
TMEM182	chr2	Unreported	1.5	no	no	no	yes	yes	no	no	yes	3	0					0	0	0	0	0	0	0	0	0	0	0	0	0	1	1	1	0	1	0	Hetero	Paternal
TMEM26	chr10	Unreported	3	no	no	no	no	no	no	no	yes	1	0					1	0	0	0	0	0	0	0	0	0	0	0	0	0	1	1	1	0	0	Hetero	Paternal
TMEM62	chr15	denovoDB	3.5									0						0	0	0	0	0	0	0	0	1	0	0	0	0	0	1	1	0	1	0	Hetero	maternal
TMEM67	chr8	Unreported	5	no	no	no	yes	yes	no	no	yes	3	0		neuroithelium, neuron, neuropore closure, cerebellum, basal ganglia, corpus callosum, brain development, microcephaly, neural tube, neural fold, brain morphology			0	1	0	0	0	0	0	0	0	0	0	0	0	0	1	1	0	1	0	Hetero	maternal
TMF1	chr3	denovoDB	2	yes	no	no	no	no	no	no	yes	2	1					0	0	0	0	0	0	0	0	0	0	0	0	0	1	1	1	0	1	0	Hetero	Paternal
TMOD3	chr15	Unreported	4									0						0	0	0	0	0	0	0	0	0	1	0	0	0	0	1	1	0	1	0	Hetero	maternal
TMPRSS11D	chr4	denovoDB	3									0						1	0	0	0	0	0	0	0	0	0	0	0	0	0	1	1	0	1	0	Hetero	Paternal
TMPRSS7	chr3	Unreported	4.5									0						0	0	0	1	0	0	0	0	0	0	0	0	0	0	1	1	0	1	0	Hetero	maternal
TMUB2	chr17	Unreported	4									0			ganglion			0	0	0	0	0	1	0	0	0	0	0	0	0	0	1	1	0	1	0	Hetero	maternal
TNFAIP8L2	chr1	Unreported	5									0						0	0	0	0	0	0	0	0	0	0	0	1	0	0	1	1	0	1	0	Hetero	Paternal
TNK2	chr3	denovoDB	4	no	no	no	no	yes	no	yes	yes	3	0		neurodevelopmental	Postnatally	DEG+PPI	0	0	0	0	0	0	0	0	0	0	0	1	0	0	1	1	0	1	0	Hetero	Paternal
TNS1	chr2	Unreported	9	no	no	no	no	no	no	no	yes	1	0			Postnatally		0	1	1	0	0	0	0	0	0	0	0	0	0	0	2	2	0	2	0	Hetero	Both
TNS3	chr7	Unreported	5.5	no	no	no	no	no	no	no	yes	1	0		neuronal migration	Postnatally		0	0	0	0	0	0	0	0	0	0	0	0	0	1	1	1	0	1	0	Hetero	maternal
TOE1	chr1	Unreported	1.5									0						0	0	0	1	0	0	0	0	0	0	0	0	0	0	1	1	0	1	0	Hetero	Paternal
TOP3A	chr17	Unreported	5	no	no	no	no	no	yes	no	no	1	0					0	0	0	0	0	0	0	0	0	0	0	0	1	0	1	1	0	1	0	Hetero	maternal
TP53BP1	chr15	denovoDB	5	yes	no	no	no	yes	no	no	yes	3	1		myelin, microenchalopathy corpus callosum,	Prenatally	DEG+PPI	0	0	0	0	0	0	0	1	0	0	0	0	0	0	1	1	0	1	0	Homo	Paternal
TPRA1	chr3	Unreported	2	yes	no	no	no	no	no	no	yes	2	1		cerebellar atrophy, osteopenia, ophthalmic anomalies, neurodevelopmental delay			0	0	0	0	0	0	0	0	0	0	0	1	0	0	1	1	1	0	0	Hetero	Paternal
TRAP1	chr16	Unreported	1.5	no	no	no	no	no	no	no	yes	1	0					0	0	0	1	0	0	0	0	0	0	0	0	0	0	1	1	0	1	0	Hetero	Paternal
TRAPPC11	chr4	denovoDB	7	no	no	no	no	no	no	no	yes	1	0					0	0	0	0	0	0	0	0	0	0	0	0	0	1	1	1	0	1	0	Hetero	Paternal
TRAPPC3	chr1	Unreported	6.5	no	no	no	no	no	no	no	yes	1	0					0	0	0	0	0	0	0	0	1	0	0	0	0	0	1	1	1	0	0	Hetero	Paternal
TRAPPC8	chr18	Unreported	6	no	no	no	no	no	no	no	yes	1	0					0	0	1	0	0	0	0	0	1	0	0	0	0	0	2	2	1	1	0	Hetero	maternal
TRHR	chr8	Unreported	3	no	no	no	no	yes	yes	no	yes	3	0		neuron			0	0	0	0	0	0	0	0	1	0	0	0	0	0	1	1	0	1	0	Hetero	maternal
TRIM37	chr17	denovoDB	7.5	no	no	no	no	no	no	yes	no	1	0			Postnatally	DEG+PPI	0	1	0	0	0	0	0	0	0	0	0	0	0	0	1	1	0	1	0	Hetero	maternal
TRIM41	chr5	Unreported	4									0						0	0	0	0	0	0	1	0	0	0	0	0	0	0	1	1	1	0	0	Hetero	Paternal
TRIM55	chr8	denovoDB	2									0						0	0	0	0	0	1	0	0	0	0	0	0	0	0	1	1	0	1	0	Hetero	maternal
TRIO	chr5	SFARI score 1	9	yes	yes	no	yes	yes	no	no	no	4	2		neural crest, neuron, neuronal migration, dentate gyrus, microenchalopathy corpus callosum,	Prenatally	DEG+PPI	0	0	0	0	0	0	1	0	0	0	0	0	0	0	1	1	0	1	0	Hetero	Paternal
TRIP10	chr19	Unreported	3.5	no	no	no	no	no	no	no	yes	1	0			Prenatally		0	0	0	0	0	0	0	0	1	0	0	0	0	0	1	1	0	1	0	Hetero	maternal
TRNT1	chr3	Unreported	3	no	no	no	no	yes	no	no	no	1	0					0	0	0	0	1	0	0	0	0	0	0	0	0	0	1	1	0	0	1	Hetero	maternal
TRPM2	chr21	denovoDB	1	no	yes	no	no	no	yes	no	yes	3	1		brain wave pattern, dendrite,			0	0	0	0	0	0	0	0	0	0	0	1	0	0	1		0	1	0	Hetero	Both
TRPM3	chr9	denovoDB	7.5	no	no	no	yes	yes	yes	no	yes	4	0	pain	cerebellar ataxia, psycho delay			0	0	0	0	0	0	0	0	0	0	0	0	1	0	1	1	0	1	0	Homo	Paternal
TRPM4	chr19	Unreported	4	no	no	no	no	yes	no	no	no	1	0		dendrite			0	0	0	0	0	0	0	1	0	0	0	0	0	0	1	1	1	0	0	Hetero	Paternal
TRPV1	chr17	Unreported	2	no	no	no	no	yes	yes	no	yes	3	0	pain	neurotransmitter, neuron, long term dression, long term potentiation, NPC, synapse			0	1	0	0	0	0	0	0	0	0	0	0	0	0	1	1	1	0	0	Hetero	maternal
TSHB	chr1	Unreported	3	yes	no	no	no	no	no	no	yes	2	1		neuron			0	0	0	0	0	0	0	0	0	0	0	0	1	0	1	1	1	0	0	Hetero	maternal
TSNARE1	chr8	denovoDB	2.5	yes	no	no	no	yes	no	no	yes	3	1					0	0	0	0	0	0	1	0	0	0	0	0	0	0	1	1	1	0	0	Hetero	maternal
TTC14	chr3	denovoDB	2.5									0						1	0	0	0	0	0	0	0	0	0	0	0	0	0	1	1	0	1	0	Hetero	maternal
TTC28	chr22	Unreported	3	no	no	no	yes	no	no	yes	no	2	0		crania	Prenatally		0	0	0	1	0	0	0	0	0	0	0	0	0	0	1	1	0	1	0	Hetero	maternal
TTC39B	chr9	Unreported	1.5	no	no	no	yes	no	no	no	yes	2	0					0	0	0	0	0	0	0	0	0	0	0	0	0	1	1	1	0	1	0	Hetero	Paternal
TTLL6	chr17	Unreported	3.5	no	no	no	no	no	no	no	yes	1	0					0	0	0	0	0	1	1	0	0	0	0	0	0	0	2	2	2	0	0	Hetero	Both
TTLL8	chr22	Unreported	2.5	no	no	no	no	no	no	no	yes	1	0					0	0	0	1	0	0	0	0	0	0	0	0	0	0	1	1	0	0	1	Homo	Paternal
TTN	chr2	SFARI score 3	5	no	no	no	no	yes	no	no	no	1	0		microcephaly			0	0	0	0	1	0	0	0	0	0	0	0	0	1	2	2	0	2	0	Hetero	maternal
TTPAL	chr20	Unreported	1.5									0						0	0	0	0	0	0	0	0	0	0	1	0	0	0	1	1	0	1	0	Hetero	Paternal
TUBA4A	chr2	Unreported	2.5	no	no	no	no	no	no	no	yes	1	0			Postnatally	DEG+PPI	0	0	0	0	0	0	0	0	0	0	0	1	0	0	1	1	1	0	0	Hetero	maternal
TUBGCP6	chr22	Unreported	7.5	no	no	no	no	yes	no	no	yes	2	0		cerebral,			0	0	0	0	0	0	0	0	1	0	0	0	0	0	1	1	0	1	0	Hetero	Paternal
TXNDC17	chr17	Unreported	4									0			oxytocin signalling			0	0	0	0	1	0	0	0	0	0	0	0	0	0	1	1	0	0	1	Hetero	maternal
TYW1	chr7	Unreported	4	no	no	no	no	no	no	no	yes	1	0					0	0	0	0	1	0	0	0	0	0	0	0	0	0	1	1	0	1	0	Hetero	maternal
UBE2T	chr1	Unreported	5.5	no	no	no	no	yes	no	no	no	1	0			Prenatally	DEG+PPI	0	0	0	1	0	0	0	0	0	0	0	0	0	0	1	1	1	0	0	Hetero	Paternal
UBR2	chr6	denovoDB	8									0						0	0	0	1	0	0	0	0	0	0	0	0	0	0	1	1	0	1	0	Hetero	maternal
UMPS	chr3	denovoDB	4.5	no	no	no	no	yes	no	no	no	1	0					0	0	0	0	0	0	0	0	0	0	0	0	0	1	1	1	0	1	0	Hetero	maternal
UNC13B	chr9	denovoDB	10	no	no	no	no	no	no	no	yes	1	0		neurotransmitter, synapse, neuromuscular, neuron			1	0	0	0	1	0	0	0	0	0	0	0	0	0	2	2	0	2	0	Hetero	Both
UNC45B	chr17	denovoDB	4	no	no	no	no	no	no	yes	no	1	0					0	0	0	0	0	0	0	1	0	0	0	0	0	0	1	1	0	1	0	Hetero	maternal
UPK2	chr11	Unreported	3.5									0			neuronal migration			0	0	1	0	0	0	0	0	0	0	0	0	0	0	1	1	1	0	0	Hetero	Paternal
UROS	chr10	Unreported	3.5									0				Postnatally		0	0	0	1	0	0	0	0	0	0	0	0	0	0	1	1	0	1	0	Hetero	Paternal
USH1C	chr11	Unreported	2.5	no	no	yes	no	no	no	yes	no	2	1	hearing, visual	cerebral, neuron, neuromuscular, brainstem			0	0	0	0	0	0	0	0	0	0	0	0	1	0	1	1	0	1	0	Hetero	maternal
USP13	chr3	Unreported	5.5									0			myelin			0	0	0	0	0	0	0	0	0	0	1	1	1	0	3	3	3	0	0	Hetero	Both
USP32	chr17	Unreported	8.5									0						0	0	1	0	0	0	0	0	0	0	0	0	0	0	1	1	0	1	0	Hetero	maternal
USP44	chr12	Unreported	1.5	no	no	no	no	no	yes	no	no	1	0					0	0	0	0	0	0	0	0	0	0	0	0	0	1	1	1	0	1	0	Hetero	maternal
USP45	chr6	SFARI score 2	1.5	no	no	no	no	no	no	no	yes	1	0					0	0	0	0	0	0	0	1	0	1	0	0	1	1	4	4	4	0	0	Hetero	Both
USP6NL	chr10	Unreported	3									0				Prenatally	DEG+PPI	2	0	0	0	0	0	0	0	0	0	0	0	0	0	2	1	1	1	0	Hetero	Paternal
VAMP1	chr12	Unreported	4.5	no	no	no	no	yes	no	no	yes	2	0		synapse	Postnatally		0	0	0	1	0	0	0	0	0	0	0	0	0	0	1	1	0	1	0	Hetero	maternal
VAPB	chr20	Unreported	2	no	no	no	no	no	yes	no	no	1	0		axon, neuron, synapse			0	0	0	0	0	0	0	0	0	0	0	1	0	0	1	1	0	1	0	Hetero	maternal
VCP	chr9	denovoDB	7	no	yes	yes	yes	yes	no	no	yes	5	2		neurodevelopmental, cerebral, neuron, synapse, brain morphology			0	0	0	0	0	1	0	0	0	0	0	0	0	0	1	1	0	0	1	Hetero	Paternal
VPS13B	chr8	SFARI score 1	6.5									0			cerebellum			0	1	0	0	0	0	0	0	0	0	0	0	0	0	1	1	0	1	0	Hetero	Paternal
VPS13C	chr15	Unreported	6	yes	no	no	no	yes	no	no	yes	3	1					0	0	0	0	0	0	1	0	0	0	0	0	0	0	1	1	0	1	0	Hetero	maternal
VPS39	chr15	denovoDB	7.5	no	no	no	no	no	no	no	yes	1	0					0	0	1	0	0	0	0	0	0	0	0	0	0	0	1	1	0	1	0	Hetero	maternal
VTA1	chr6	Unreported	5	no	no	no	no	no	no	no	yes	1	0		neurodevelopmental	Prenatally	DEG+PPI	0	0	0	0	0	0	1	0	0	0	0	0	0	0	1	1	0	1	0	Hetero	Paternal
VWA2	chr10	Unreported	1.5									0						0	0	1	0	0	0	0	0	0	0	0	0	0	0	1	1	0	1	0	Hetero	Paternal
VWA8	chr13	denovoDB	4	yes	no	no	no	no	no	no	no	1	1					0	0	0	0	0	0	0	0	0	0	0	0	1	0	1	1	1	0	0	Hetero	maternal
WDR62	chr19	Unreported	4	no	yes	no	yes	yes	yes	no	yes	5	1		cerebral cortex, neuron, corpus callosum, brain development, microcephaly, NPC, brain morphology			0	0	0	1	0	0	0	0	0	0	0	0	0	0	1	1	1	0	0	Hetero	maternal
WDSUB1	chr2	Unreported	2.5									0						0	0	0	1	0	0	0	0	0	0	0	0	0	0	1	1	0	1	0	Hetero	maternal
WFS1	chr4	denovoDB	7.5	yes	yes	no	yes	yes	yes	yes	yes	7	2	hearing, visual	dendrite, cerebral, neuron	Postnatally	DEG+PPI	0	0	0	0	0	1	0	0	0	0	0	0	0	0	1	1	0	1	0	Hetero	Paternal
WNT2	chr7	Unreported	7	yes	no	no	no	no	no	no	no	1	1		CNS, dopaminergic neuron, neuron			0	0	0	0	0	0	0	0	0	0	0	1	0	0	1	1	0	1	0	Hetero	Paternal
WNT7A	chr3	Unreported	5	no	no	no	no	yes	yes	no	no	2	0		dendrite, neuron, axon, synapse, brain morphology	Prenatally	DEG+PPI	0	0	0	0	0	0	1	0	0	0	0	0	0	0	1	1	0	1	0	Hetero	maternal
WSCD1	chr17	Unreported	1.5	no	no	no	no	yes	no	no	yes	2	0			Prenatally		0	0	0	0	0	1	0	0	0	0	0	0	0	0	1	1	0	1	0	Hetero	Paternal
WWOX	chr16	SFARI score 2	7.5	no	yes	no	no	no	yes	no	yes	3	1		brain development, cerebellum, microenchalopathy corpus callosum,			0	0	0	0	1	0	0	0	0	0	0	0	0	0	1	1	0	1	0	Hetero	Paternal
XDH	chr2	denovoDB	4	yes	no	no	no	no	no	no	no	1	1		neuron			0	0	0	0	0	0	0	0	0	1	0	0	0	0	1	1	0	1	0	Hetero	Paternal
XIRP2	chr2	denovoDB	3.5	yes	no	no	no	no	no	yes	no	2	1					0	0	0	1	0	0	0	0	0	0	0	0	0	0	1	1	0	1	0	Hetero	maternal
XRCC1	chr19	Unreported	4									0						0	0	0	0	0	0	0	0	0	0	0	1	0	0	1	1	0	1	0	Hetero	maternal
YAP1	chr11	Unreported	8.5	no	no	no	yes	no	no	no	yes	2	0		neuron, nerve conduction, neuronal migration			0	0	0	0	0	0	0	0	0	0	1	0	0	0	1	1	0	1	0	Hetero	maternal
YTHDC2	chr5	SFARI score 3	5.5	no	no	no	yes	no	yes	yes	yes	4	0					0	0	0	0	0	0	0	0	0	1	0	0	0	0	1	1	0	1	0	Hetero	maternal
ZBTB46	chr20	denovoDB	3									0			dendrite			1	0	0	0	0	0	0	0	0	0	0	0	0	0	1	1	0	1	0	Hetero	maternal
ZBTB48	chr1	denovoDB	4.5	no	no	no	no	no	no	no	yes	1	0					0	0	0	0	0	0	0	0	1	0	0	0	0	0	1	1	0	1	0	Hetero	Paternal
ZFHX4	chr8	Unreported	10.5	no	no	no	yes	no	no	no	yes	2	0			Prenatally		0	0	1	0	0	0	0	0	0	0	0	0	0	0	1	1	0	1	0	Hetero	maternal
ZFYVE16	chr5	Unreported	1.5	no	no	no	no	yes	no	no	yes	2	0					0	0	0	1	0	0	0	0	0	0	0	1	0	1	3	3	0	3	0	Hetero	Paternal
ZNF292	chr6	SFARI score 1	8	yes	no	no	no	no	no	no	yes	2	1			Prenatally		0	0	0	0	0	0	0	0	0	0	1	0	0	0	1	1	0	1	0	Hetero	Paternal
ZNF559	chr19	SFARI score 3	2.5									0						0	0	0	0	0	0	0	0	1	0	0	0	0	0	1	1	0	0	1	Hetero	Paternal
ZNF655	chr7	Unreported	3.5									0						0	0	0	0	0	1	0	0	0	0	0	0	0	0	1	1	1	0	0	Hetero	maternal
ZSWIM5	chr1	Unreported	4									0			axon	Prenatally		0	0	0	0	0	0	0	0	0	0	0	1	0	0	1	1	0	1	0	Hetero	Paternal
ZW10	chr11	Unreported	7	no	no	no	no	no	no	no	yes	1	0		neurodevelopmental			0	0	1	0	0	0	0	0	0	0	0	0	0	0	1	1	0	1	0	Hetero	maternal
Total																		59	71	64	59	58	47	61	56	63	64	54	67	66	63

## Sheet: Core Behaviour gene list
Autism	Social Interaction (SI)	Restrictive Repetitive Behaviour (RRB)	Communication & Language (CL)	Cognition, Intelligence & Learning (CIL)	Emotions & Moods (EM)	Activity (Act)	Sensory Impairments	Motor Skills
XIRP2	RYR3	CNTNAP2	DOCK7	DOCK7	CNTNAP2	CNTNAP2	CNTNAP2	CNTNAP2
ARID4A	CTTNBP2	GABRB3	SACS	CNTNAP2	EP300	GATM	GATM	GATM
PRF1	CTNNA2	HGS	CNTNAP2	EP300	GATM	WFS1	WFS1	WFS1
DIXDC1	ANK3	VCP	EP300	GATM	WFS1	CTTNBP2	ESR1	ESR1
RYR3	SORL1	SYNE1	GATM	WFS1	CTTNBP2	SORL1	GABRB3	GABRB3
CTTNBP2	ESR1	CHD7	WFS1	CTTNBP2	SORL1	KALRN	CHD7	CHD7
CTNNA2	CNTNAP2	CNTN5	CTTNBP2	SORL1	NALCN	ESR1	PITX3	PITX3
ANK3	DPYD	EP300	SORL1	TRIO	KALRN	RYR3	CCDC141	MYO7A
SORL1	DLG2	ARHGEF11	SYNE1	SMG1	HMGA2	CTNNA2	MYO7A	PDYN
CLPP	LAMA1	SLC36A1	TRIO	NALCN	ESR1	PRF1	PDYN	COL1A1
ESR1	KIF1B	CLCNKA	CACNA1H	KALRN	ASIC2	GABRB3	COL1A1	PENK
CNTNAP2	NBAS	KRT75	CACNG3	HMGA2	RYR3	CHD7	PENK	HMBS
DPYD	ADSL	CKMT1B	SMG1	ESR1	CTNNA2	PITX3	CACNA2D3	FLII
WNT2	HIVEP2	JAG1	NALCN	APC	ADSL	CCDC141	PPARGC1B	GLB1
RASSF8	GABRB3	EPHB1	KALRN	FLII	PRF1	MYO7A	HMBS	KIF1B
CYP1B1	WFS1	FLII	CPT1A	ASIC2	WDR62	ANK3	FLII	HIVEP2
RPS23	SPAST	SLC26A4	HMGA2	RYR3	TRPM3	PDYN	GLB1	USH1C
RNF4	JAK2	MYO7A	CCBE1	CTNNA2	DCDC2	COL1A1	KIF1B	TECPR2
VWA8	APC	CCDC141	SETX	ADSL	SPAST	GPR83	HIVEP2	IREB2
LSG1	TRIO	CELSR1	ESR1	VCP	GABRB3	PENK	USH1C	CLPP
PAG1	LAMC2	USH1C	APC	DPYD	CHD7	NEB	TECPR2	FZD4
AMPD1	OCA2		FLII	PRF1	CNTN5	LAMA1	TBC1D8	EP300
CCDC18	PRSS12		TENM3	CRBN	SLC6A15	YTHDC2	IREB2	SPAST
GPR141	PSEN2		ASIC2	ASTN1	PITX3	ARHGEF11	F2RL1	CNTN5
EBF4	ASCC3		RYR3	PSEN2	CCDC141	PDE11A	CLPP	SLC26A4
DNAH9	TBK1		CTNNA2	WDR62	MYO7A	DIXDC1	COL11A1	FGFR3
FOXN1	CCBE1		LAMA1	DOCK8	SLC26A4	CACNA2D3	SLC44A2	JAK2
ROBO3	TRPM2		ADSL	ASCC3	ANK3	PDLIM5	ALDOB	PTK2B
QSER1	FASN		VCP	CNTNAP5	NBAS	SLITRK6	ELMOD3	DOCK7
BUB1	GSS		DPYD	PCDH17	PDYN	PPARGC1B	FZD4	DDOST
CRBN	HTR2B		PRF1	GNPTAB	COL1A1	HMBS	MYO3A	IGF2
LHFPL4	PARP1		CRBN	RIMS2	FGFR3	STX16	EP300	MYO9A
DGCR6L	POLE		ELP4	EPHA7	GPR83	FLII	ASIC2	CACNA1D
DLG2	FOLR1		ASTN1	TRPM3	CSMD2	DPYD	TRPM3	LRP2
LRRN1	GM2A		PSEN2	GLB1	WNT7A	CRBN	DCDC2	SIX3
SLC6A15	ABCC9		TBK1	DCDC2	PENK	GLB1	SPAST	HIPK2
LAMA1	ANK2		ABCC9	DDOST	DOLK	CKMT1B	CNTN5	ALG3
MDN1	WWOX		ANK2	GNE	TRPV1	KIF1B	SLC26A4	SIX6
SOS1	SCAPER		WDR62	ARHGEF12	SPRED1	HIVEP2	FGFR3	SPG7
SH3TC2	NALCN		DOCK8	TCTN2	STT3A	USH1C	DOLK	SPG11
PDE6C	WDR62		ARID4A	TMEM67	TRHR	SLC18A3	TRPV1	SZT2
ANO1	KALRN		ASCC3	ACOX2	NDUFS3	TNK2	ADGRV1	COX6B1
LOXHD1	PDE11A		CNTNAP5	COG6	NEB	TECPR2	JAK2	NOTCH3
KIF1B	DOCK7		PCDH17	LEMD3	SYNE1	TBC1D8	PTK2B	SACS
SPTB	HGS		TTC28	TMEM182	CCBE1	GHSR	DOCK7	SETX
SCN3A	GPR151		PREX2	SPAST	LAMA1	PAX5	APC	TENM3
NRP2	SLC18A3		ATP2A3	EPHB1	ADGRV1	RNF19A	PCDH17	HGS
TPRA1	DOCK8		GNPTAB	IGF2	YTHDC2	CHTF18	DDOST	DGCR6L
IQGAP3	VCP		FARP1	GABRB3	LRRN1	CHAT	EPHB1	GSS
AXIN2			KAT6B	CHD7	SDK1	ARID4A	IGF2	SERPINE2
XDH			FN1	CNTN5	FASN	TTC28	MYO9A	GPSM1
TSHB			SNCAIP	OCA2	JAK2	PREX2	CACNA1D	MTRF1
IGSF21			RIMS2	QSER1	ARHGEF11	FARP1	LRP2	ATP13A5
KMT2C			EPHA7	SLC6A15	TRPM2	IREB2	SIX3	ABCG5
ZNF292			LRP4	HDAC2	PDE11A	FBP2	HIPK2	SLC34A1
ATP9B			PDGFRA	NPTX2	DIXDC1	BUB1	MSH6	DLD
KCNE2			ABCA8	SMARCA4	PTK2B	F2RL1	SYNJ2	FLNB
MCF2L			FBN3	TP53BP1	CACNA2D3	CLPP	VAMP1	DNAH5
DNAJC10			INTS7	GM2A	PDLIM5	PRSS12	ALG3	SORL1
PNPLA7			SLC37A1	CKMT1B	SLITRK6	IPO9	SIX6	KALRN
TMF1			ZFHX4	MYO9A	CREB5	XIRP2	SPG7	PRF1
IPO9			IREB2	KIF1B	AASDHPPT	COL11A1	SPG11	ANK3
HDAC2			SCN11A	HIVEP2	KCNJ16	SLC44A2	CD36	NEB
NPTX2			TRPM3	PITX3	MICAL2	MYLIP	EEF2K	LAMA1
VPS13C			GLB1	CCDC141	FSTL4	TRIM37	SZT2	PDE11A
TSNARE1			ADGRV1	CACNA1D	LTBP3	SAMD4A	COX6B1	DIXDC1
CEP290			DCDC2	LRP2	PPARGC1B	ALDOB	NOTCH3	DPYD
SMARCA4			DDOST	MYO7A	HMBS	ELMOD3	SACS	CRBN
TP53BP1			MYH3	USH1C	ACP2	FZD4	SETX	SLC18A3
CACNA1H			GNE	SLC26A4	ADCY7	MYO3A	TENM3	CHTF18
ELP4			DZIP1	ANK3	RAB5A	HMX2	SCN11A	CHAT
CACNG3			EFHC1	LAMC2	VAPB	STX6	DLG2	ARID4A
CPT1A			NUP155	NBAS	ANKRD27	SLC8A3	LHFPL4	FARP1
ASTN1			RTTN	FOXN1	AQP2	DMBX1	CELSR1	IPO9
CNTNAP5			HEATR1	ROBO3	BRD8	DBNL	PDE6C	SAMD4A
SDK1			ARHGEF12	CEP290	DPH6	ATRN	RABGGTA	HMX2
NDUFB7			TCTN2	JAG1	GLT8D1	DHX29	SH3TC2	STX6
NRP1			TMEM67	SLC18A3	MROH2A	GAA	HGS	DMBX1
LARP1			OBSL1	TSNARE1	MYO18B	ALG8	SOS1	DBNL
LAMB1			COL12A1	VPS13C	PLCD4	CYP7A1	ANO1	ATRN
RABGGTA			YAP1	SIX3	PLEK	FOCAD	DGCR6L	DHX29
F2RL1			ACOX2	HIPK2	SFMBT2	PDZD8	GSS	GAA
SMG1			ANKRD44	PDYN	STX16	PKHD1L1	LOXHD1	STT3A
HMGA2			COG6	MSH6	TOP3A	PLIN2	TGFBI	NALCN
SYNE1			COL28A1	COL1A1	USP44	PMEL	MADD	HMGA2
NBAS			COQ3	SYNJ2		SAFB2	CPT1B	ADSL
ADSL			DPYS	FGFR3		UNC45B	GRIN3A	WDR62
GATM			FAM20A	LTBP1		STT3A	SERPINE2	NBAS
CHD7			FBP2	TNK2			MAPKAPK3	WNT7A
HIVEP2			FRAS1	GPR83			GPSM1	TRHR
GABRB3			GNA14	SYNJ1			COCH	NDUFS3
MYO9A			HPSE2	IRS1			MYH14	RAB5A
CACNA1D			INSC	CSMD2			CHM	AQP2
LRP2			KIF12	SCN1B			GNAT2	SMG1
IGF2			LEMD3	GLI2			MTRF1	VCP
SETX			LMAN1	WNT7A			ACADL	DOCK8
SACS			LRP1B	VAMP1			TAS1R3	GNPTAB
TENM3			PPAT	SREBF1			HIPK1	GNE
PITX3			RNGTT	SMOX			ATP13A5	TCTN2
WFS1			RPAP3	UBE2T			GDF3	TMEM67
ASIC2			SLC5A12	FANCG			MPL	ACOX2
CNTN5			STARD13	WSCD1			F5	COG6
EP300			TMEM182	ALG3			ABCG5	LEMD3
SPAST			TTC39B	SIX6			NLRP12	OCA2
JAK2			YTHDC2	SPG7			SLC24A4	QSER1
APC				SPG11			SLC34A1	SMARCA4
TRIO				CD36			DLD	TP53BP1
LAMC2				PENK			FLNB	GM2A
OCA2				DOLK			PDHB	LAMC2
				EEF2K			COL4A3	ROBO3
				TRPV1			DNAH5	CEP290
				TECPR2			COLGALT2	JAG1
				SZT2			GJB3	SCN1B
				COX6B1			MYO7B	GLI2
				NOTCH3			OTOS	UBE2T
				TBC1D8			SLC4A11	FANCG
				GHSR				DYNC2H1
				NFATC4				TTN
				ATG2B				DAZAP1
				TRPM4				POMGNT2
				FBXW8				AGA
				NT5C1A				GALC
				MAP3K4				MED17
				SYPL2				KIAA0586
				DYNC2H1				RFWD3
				TTN				HADHA
				DAZAP1				PCCA
				PAX5				PCCB
				RNF19A				TRNT1
				CHTF18				UMPS
				CHAT				ABCC9
				NFATC2				ANK2
				TUBGCP6				LRP4
				CYBB				PDGFRA
				PTCH1				OBSL1
				CLCN7				COL12A1
				GAK				YAP1
				POMGNT2				COQ3
				AGA				KIF12
				GALC				LMAN1
				MED17				TTC39B
				KIAA0586				NDUFB7
				RFWD3				NRP1
				SPRED1				MDN1
				STT3A				LARP1
				TRHR				LAMB1
				NDUFS3				WWOX
				BNIP3L				SCAPER
				DENND4A				SLC4A3
				DGKQ				FAT1
				DMXL1				AGRN
				HADHA				LAMB2
				KCNS3				CTNND1
				LDLRAD4				RAB11FIP5
				LIMA1				CC2D2A
				MRPL24				CLCN2
				NEB				KIF20B
				PCCA				ACBD5
				PCCB				DNAH3
				ROS1				ADCY6
				TRNT1				NFE2L1
				UMPS				GANAB
				ZFYVE16				GPC1
								MPP4
								NTN3
								DNAH8
								SMARCAL1
								ATP7B
								BTBD1
								LPIN1
								HLTF
								ADGRA3
								AP5Z1
								CALCOCO1
								DCTN4
								DYNC1I2
								EIF3K
								ELF1
								EPN2
								GOSR2
								KAT14
								SYF2
								LMLN
								MST1

## Sheet: Sensory gene list
Hearing	Pain	Visual	Vibratory	Thermal	Olfactory	Touch	Tactile stimuli (pain, touch,thermal)	sensory+ neuronal
WFS1	HIVEP2	WFS1	PDYN	CNTNAP2	CNTNAP2	SLC24A4	HIVEP2	MSH6
CELSR1	EPHB1	COL11A1	SACS	CPT1B	SLC24A4	MADD	EPHB1	SPAST
COL11A1	CCDC141	CACNA1D	SETX	PPARGC1B			CCDC141	APC				# Genes	% Total Behaviour genes
DNAH5	FLII	LRP2	SPG11	ACADL			FLII	PTK2B			Sensory genes	116	21.5613
FLNB	HMBS	MYO7A	SPAST				HMBS	EEF2K
MYH14	IREB2	USH1C	SPG7				IREB2	SOS1				# Genes	% of Sensory genes
MYO7B	MSH6	ADGRV1					MSH6	SYNJ2			neuronal	86	74.1379
NOTCH3	NLRP12	COL1A1					NLRP12	PDHB			non-neuronal	30	25.8621
SLC4A11	PTK2B	DOCK7					PTK2B	CNTNAP2			core groups	43	37.069
SYNJ2	SCN11A	MYO9A					SCN11A	HIVEP2			associated groups	71	61.2069
GABRB3	TRPM3	PDE6C					TRPM3	SLC44A2			core+ass	82	70.6897
CHD7	EP300	RABGGTA					EP300	ELMOD3			maternally	61	52.5862
CNTN5	CACNA2D3	HIVEP2					CACNA2D3	COCH			paternally	51	43.9655
CACNA1D	CNTNAP2	CHM					CNTNAP2	SLC26A4			both mat+pat	4	3.44828
LRP2	DLG2	ALG3					DLG2	COL4A3			hetero	113	97.4138
LHFPL4	IGF2	GNAT2					IGF2	ASIC2			homo	3	2.58621
ASIC2	APC	MTRF1					APC	KIF1B
CLPP	ESR1	SIX3					ESR1	GLB1
DGCR6L	JAK2	SIX6					JAK2	GABRB3
GSS	ANO1	TGFBI					ANO1	TRPM3
LOXHD1	F2RL1						F2RL1	LHFPL4
MYO7A	PITX3						PITX3	DGCR6L
SLC26A4	SOS1						SOS1	ALG3
USH1C	TENM3						TENM3	DNAH5
ADGRV1	ABCG5						ABCG5	MPL
COCH	ALDOB						ALDOB	CLPP
COL1A1	F5						F5	SPG7
COL4A3	GRIN3A						GRIN3A	MYO9A
COLGALT2	MAPKAPK3						MAPKAPK3	MYO7A
COX6B1	MPL						MPL	USH1C
DCDC2	PDYN						PDYN	EPHB1
DDOST	SERPINE2						SERPINE2	SZT2
DLD	TECPR2						TECPR2	COL1A1
ELMOD3	TRPV1						TRPV1	FZD4
FGFR3							CPT1B	WFS1
FZD4							PPARGC1B	F2RL1
GJB3							ACADL	DCDC2
MYO3A							SLC24A4	SETX
OTOS							MADD	PENK
PDHB								GRIN3A
SLC44A2								DLG2
TBC1D8								HIPK2
								CACNA1D
								IREB2
								ESR1
								DOLK
								F5
								HMBS
								SPG11
								PDYN
								SACS
								CD36
								SH3TC2
								NOTCH3
								FGFR3
								CELSR1
								DISP1
								HIPK1
								DLD
								TECPR2
								HGS
								EP300
								CHD7
								LRP2
								TAS1R3
								MYH14
								PDE6C
								CCDC141
								CACNA2D3
								ADGRV1
								GSS
								DOCK7
								TENM3
								MADD
								IGF2
								FLII
								FLNB
								JAK2
								TRPV1
								MAPKAPK3
								COX6B1
								PITX3
								SIX3
								PCDH17
								SERPINE2
								SCN11A

## Sheet: Comorbidities gene list
Epilepsy/Seizure (EP)	Intellectual Disability (ID)	Schizophrenia (SCZ)	ADHD	Bipolar Disorder (BP)	Mental Retardation	Dementia	OCD	Circadian
ADSL	YAP1	CRB1	CSMD2	CSMD2	ALG3	LMAN1	RYR3	YTHDC2
ANK3	FMNL1	FBXW4	ANK3	ANK3	GATM	PRDX3	SAFB2	LRP1B
APC	MADD	CNTN5	ASPM	NUMB	PRF1	NPLOC4	CHD7	SAMD4A
ASIC2	KRIT1	CHM	CNTN5	CNTN5	TCTN2	PSEN2		VTA1
ASTN1	TNK2	DPYD	TP53BP1	CTNNA2	COG6	ZFYVE16		NALCN
ATP9B	NUP155	BUB1	CNTNAP2	CNTNAP2	PCCA	CHAT		F13A1
AXIN2	COG6	ADGRV1	CHD7	NALCN	ACOX2	PENK		SLC4A1
BUB1	TRAPPC8	GPC1	GLT8D1	RDH14	LRP2	LTBP1		TMEM26
CACNA1D	IPO9	DLD	CNTNAP5	WWOX	UBE2T	SNCAIP		ADAMTS14
CACNA1H	CCT8	RBM19	SFMBT2	GLT8D1	TECPR2	NOL11		COL28A1
CACNG3	ZFYVE16	ITIH1	FLII	SFMBT2	CHD7	GANAB		RNF19A
CEP290	FAT1	ADCY7	PTCH1	SPRED1	NALCN	DLD		BRINP2
CLPP	SLC37A1	ACBD5	SPRED1	ADAMTS14	DPYD	SPG11		TRHR
CNTN5	KAT6B	ELF1	ARHGEF12	TTC39B	SLC26A4	IGSF21		CCBE1
CNTNAP2	WWOX	TSNARE1	CHMP7	SVEP1	SIX3	RNF19A		CACNA2D3
CNTNAP5	PTK2B	GABRB3	SVEP1	COL28A1	CEP290	ASIC2		MYO18A
CTNNA2	CNTNAP5	TMEM182	CREB5	PDZD8	PCCB	ASTN1		SLC26A7
DGCR6L	HEATR1	STT3A	MSH6	GALC	FLII	SORL1		FRAS1
DLG2	TRAPPC11	KMT2C	TTLL8	SORL1	FANCG	SPRY4		EP300
DNAJC10	ARID4A	ANK3	DLG2	ITIH1	HADHA	VCP		GNE
ELP4	ADGRV1	SAMD4A	MICAL2	CLSPN	RFWD3	TATDN1		LMAN1
EP300	GPC1	NALCN	DNAH3	SLCO4A1	TMEM67	RAB5A		NMBR
GABRB3	AURKB	PDLIM5	ADGRA3	VPS13C	GALC	VPS13C		TGFBI
HDAC2	TTC39B	LIMA1	ACBD5	MYO18B	POMGNT2	GM2A		CHAT
HMGA2	GSS	DYNC1I2	SYNE1	TTLL6	KAT14	IRS1		HIPK2
IGSF21	GANAB	TMEM26	NUCB1	CRBN	IGF2	PSMB4		SERPINE2
IPO9	RFWD3	ANK2	NRP2	NFATC2	TRHR	NGB		RELB
IQGAP3	CUL9	GRIN3A	TMEM182	SYNE1	CACNA1D	F2RL1		ARHGEF12
JAK2	SAE1	EPHB1	STT3A	INTS7	UMPS	RAB38		SETX
KCNE2	CACNG3	BRINP2	GNE	TMEM182	GM2A	SMOX		CACNA1D
KIF1B	SMC4	KALRN	PAX5	STT3A	FGFR3	PARP1		ADCY7
LAMB1	ASIC2	MICAL2		WSCD1	DDOST	ABCC9		NBAS
LAMC2	SYF2	TTLL6		KCNS3	KIAA0586	RPN2		GPR83
LARP1	PFAS	ZNF292		PDGFRA	MPP4	CAPN2		LTBP3
LHFPL4	GAK	SERPINB1			CRBN	GALNT7		GABRB3
MCF2L	METTL25	SCAPER			DOCK8	SMG1		HMBS
MYO9A	OGDHL	KCNS3			SZT2	TBK1		PSMA4
NDUFB7	RAB5A	VAMP1			HIVEP2	MASP2		MADD
NRP2	VPS13C	HDAC2			SIX6	GNE		SIX3
RABGGTA	FGFR3	DLG1			LEMD3	GTPBP4		EPHB1
RYR3	DDOST	CFAP58			NDUFS3	CCT8		GAK
SACS	CTNND1	JAK2			WDR62	CD63		SPRY4
SCN3A	ATRN	ESR1			MED17	PSMA4		ABCA13
SETX	UNC13B	EFCAB14			DOCK7	TUBA4A		SLC8A3
SMARCA4	FASN	CNTNAP2			COX6B1	CUL9		HIVEP2
SMG1	MYO18A	PENK			HMGA2			FAH
SORL1	TMF1	WWOX			GABRB3			ADCY6
SPAST	CRBN	GLT8D1			EP300			MYLIP
SPTB	FLNB	SFMBT2			STT3A			NFE2L1
TMF1	LARP1	EEFSEC			ADSL			PRKAG1
TP53BP1	RCC2	PDZD8			GNE			HDAC2
TPRA1	MASTL	GALC			GLI2			TNS1
TRIO	ADGRA3	CACNG3			DMBX1			GSS
TSHB	SCAPER	SPG7			SCN1B			CACNA1H
VPS13C	SZT2	CLDN10			MYO7A			POLL
WFS1	LRP4	TENM3			SMARCA4			CPT1A
XDH	SMG1	OTOS			TRNT1			CAPN2
ZNF292	SYNE1	CAPN2			SORL1			PITX3
ABCG5	ADCY6	LRP4			AGBL4			NFE2L3
ACP2	RNGTT	SYNE1			CTTNBP2			PNPLA7
ADCY6	EP300	HMGA2			VPS13C			AGA
ADGRA3	ARAP1	ARAP1			DCDC2			STX16
ADGRV1	ANKRD44	EPN2			MYO18B			TNK2
AGA	VPS39	MCF2L			CACNA2D3			PRF1
AGRN	DGCR6L	PLAA			INTS7			RYR3
ALG3	STT3A	RYR3			TTC39B			DIXDC1
ANK2	COG5	CNTNAP5			CNTN5			PSEN2
ANKRD44	NFE2L1	POLE			COL28A1			SREBF1
AP5Z1	SLC7A2	TRIO			KCNS3			POLE
ARAP1	ASCC3	RAB11FIP5			CNTNAP2			RAB11FIP5
ARHGEF11	LMAN1	BNIP3L			RDH14			KIF1B
ASCC3	OBSL1	RUNX1			WFS1			RAB5A
ASPM	KIF20B	AXIN2			GSS			NGB
ATRN	PNPLA7	KIF1B			RYR3			ARHGEF11
AURKB		DLG2			HMBS			SIX6
BRINP2		MAP3K9			PDE11A			SDK1
CAPN15		CERCAM			SAFB2			AATK
CAPN2		VPS13C			MAN1C1			CYP7A1
CC2D2A		MYO18B			SCN3A			CUL9
CD36		NRP1			NEB
CDX1		IRS1			TNK2
CHAT		EP300			ASPM
CHM		DGCR6L			SYNJ1
CHTF18		TSHB			EFHC1
CLCN2		AASDHPPT			CHAT
CLCN7		TRAPPC3			WWOX
CLEC12A		APC			ELP4
COG5					PTCH1
COG6					PNPO
COL12A1					SLC18A3
COL17A1					TUBGCP6
COL28A1					KCNJ16
COL6A2					MCF2L
COQ3					AGA
CYBB					GAA
DBNL					POLE
DBR1					TRIO
DGKQ					ANK2
DHX29					RELB
DMXL1					KIF1B
DMXL2					DLG2
DNAH12					TPRA1
DOCK7					SIGLEC1
DOLK					TRIP10
DSG4					APC
DZIP1
EFHC1
EPHA7
EPHB1
EPHB3
ESYT1
EXOC7
F13A1
F5
FAH
FARP1
FASN
FAT1
FERMT1
FGFR3
FLNB
FLRT1
FMNL1
FN1
FOLR1
FZD4
GAA
GAK
GALC
GANAB
GLB1
GM2A
GNA14
GOSR2
GPC1
GSS
GTPBP4
HEATR1
HGS
HIPK2
HSPA13
HTR2B
KALRN
KCNH2
KCNJ16
KIAA0586
KRIT1
LAMB2
LMAN1
LTBP3
MASTL
MED17
METTL25
MGAT5B
MPL
MRPL24
MRPS27
MUS81
NALCN
NEB
NFE2L1
NMBR
NOL11
NUCB1
OBSL1
OGDHL
OGFOD2
PARP1
PCCB
PDGFRA
PDYN
PFAS
PLEC
PLOD2
PNKD
PNPO
POLD1
POLE
POLL
PPAT
PRDX3
PSEN2
PTCH1
PTK2B
RAB5A
RAD54B
RELB
RHOT2
RIMS2
RTN4IP1
SAE1
SCAPER
SCN1B
SCN5A
SEC23IP
SERPINE2
SGCB
SIGLEC1
SLC18A3
SLC26A4
SLC4A1
SLC4A3
SLITRK6
SPG11
STARD13
STT3A
SYF2
SYNJ1
SZT2
TECPR2
TES
TMEM67
TNK2
TNS1
TNS3
TRAP1
TRAPPC11
TRAPPC8
TRIP10
TRPM2
TRPM3
TRPV1
TUBGCP6
TYW1
UNC13B
USP45
VCP
WDR62
WWOX
YAP1
ZBTB48
ZFHX4
ZW10
